# Supplementary material for: Genome-wide comparative analysis of papain-like cysteine protease family genes in castor bean and physic nut
Source: PubMed Central journal article supplement (PMC5762910; doi:10.1038/s41598-017-18760-6), 2018-01-10
Supplement: 41598_2017_18760_MOESM1_ESM.pdf [file 41598_2017_18760_MOESM1_ESM.pdf]

---

# **Genome-wide comparative analysis of papain-like cysteine protease family genes in castor bean and physic nut**

Zhi Zou<sup>1\*</sup>, Qixing Huang<sup>2</sup>, Guishui Xie<sup>1</sup> & Lifu Yang<sup>1</sup>

<sup>1</sup> Key Laboratory of Biology and Genetic Resources of Rubber Tree, Ministry of Agriculture, Rubber Research Institute, Chinese Academy of Tropical Agricultural Sciences, Baodaoxincun, Danzhou 571737, Hainan Province, China

<sup>2</sup> Institute of Tropical Biosciences and Biotechnology, Chinese Academy of Tropical Agricultural Sciences, Xueyuan Road 4, Haikou 570100, Hainan Province, China

\*Correspondence and requests for materials should be addressed to Z.Z. (Email: zouzhi2008@126.com or zouzhi@catas.cn)

---

## Supplementary Files:

**Supplementary File S1. The gene model for *RcRD21C*.** The coding region is marked with uppercase letters, above which are its deduced amino acids. The transcribed untranslated regions, including 5' UTR, intron and 3' UTR sequences, are marked with lowercase letters. The start and stop codons are marked with bold letters.

**Supplementary File S2. The gene model for *RcXCPI*.** The coding region is marked with uppercase letters, above which are its deduced amino acids. The transcribed untranslated regions, including 5' UTR, intron and 3' UTR sequences, are marked with lowercase letters. The start and stop codons are marked with bold letters.

**Supplementary File S3. The gene model for *RcXBCP3*.** The coding region is marked with uppercase letters, above which are its deduced amino acids. The transcribed untranslated regions, including 5' UTR, intron and 3' UTR sequences, are marked with lowercase letters. The start and stop codons are marked with bold letters.

**Supplementary File S4. The gene model for *RcXBCP3L*.** The coding region is marked with uppercase letters, above which are its deduced amino acids. The transcribed untranslated regions, including 5' UTR, intron and 3' UTR sequences, are marked with lowercase letters. The start and stop codons are marked with bold letters.

**Supplementary File S5. The gene model for *RcPAP3*.** The coding region is marked with uppercase letters, above which are its deduced amino acids. The transcribed untranslated regions, including 5' UTR, intron and 3' UTR sequences, are marked with lowercase letters. The start and stop codons are marked with bold letters.

**Supplementary File S6. The gene model for *RcCTB1*.** The coding region is marked with uppercase letters, above which are its deduced amino acids. The transcribed untranslated regions, including 5' UTR, intron and 3' UTR sequences, are marked with lowercase letters. The start and stop codons are marked with bold letters.

**Supplementary File S7. The gene model for *JcSAG12H8*.** The coding region is marked with uppercase letters, above which are its deduced amino acids. The transcribed untranslated

---

regions, including 5' UTR, intron and 3' UTR sequences, are marked with lowercase letters. The start and stop codons are marked with bold letters.

**Supplementary File S8. The gene model for *JcRD21B*.** The coding region is marked with uppercase letters, above which are its deduced amino acids. The transcribed untranslated regions, including 5' UTR, intron and 3' UTR sequences, are marked with lowercase letters. The start and stop codons are marked with bold letters.

**Supplementary File S9. The gene model for *JcCEP2*.** The coding region is marked with uppercase letters, above which are its deduced amino acids. The transcribed untranslated regions, including 5' UTR, intron and 3' UTR sequences, are marked with lowercase letters. The start and stop codons are marked with bold letters.

**Supplementary File S10. The gene model for *JcXBCP3L*.** The coding region is marked with uppercase letters, above which are its deduced amino acids. The transcribed untranslated regions, including 5' UTR, intron and 3' UTR sequences, are marked with lowercase letters. The start and stop codons are marked with bold letters.

**Supplementary File S11. The gene model for *JcTH11*.** The coding region is marked with uppercase letters, above which are its deduced amino acids. The transcribed untranslated regions, including 5' UTR, intron and 3' UTR sequences, are marked with lowercase letters. The start and stop codons are marked with bold letters.

**Supplementary File S12. The gene model for *JcSAG12H1*.** The coding region is marked with uppercase letters, above which are its deduced amino acids. The transcribed untranslated regions, including 5' UTR, intron and 3' UTR sequences, are marked with lowercase letters. The start and stop codons are marked with bold letters.

**Supplementary File S13. The gene model for *JcSAG12H2*.** The coding region is marked with uppercase letters, above which are its deduced amino acids. The transcribed untranslated regions, including 5' UTR, intron and 3' UTR sequences, are marked with lowercase letters. The start and stop codons are marked with bold letters.

---

**Supplementary File S14 The gene model for *JcSAG12H7*.** The coding region is marked with uppercase letters, above which are its deduced amino acids. The intron sequences are marked with lowercase letters. The start and stop codons are marked with bold letters.

### **Supplementary Figures:**

**Supplementary Fig. S1. Detailed information of 15 motifs identified in this study.**

**Supplementary Fig. S2. Matched positions of 25 RcPLCP genes on physic nut chromosomes.** The positions were based on the synteny analysis and only 8 matched chromosomes were shown. RcPLCP genes were shown behind that of physic nut.

### **Supplementary Tables:**

**Supplementary Table S1. Detailed information of 31 PLCP genes in *Arabidopsis*.**<sup>1</sup> “Yes” represents genes containing alternative splicing isoforms; <sup>2</sup> “S, M and C” represent signal peptide, mitochondrial targeting peptide or chloroplast transit peptide, respectively, which was predicted by iPSORT; <sup>3</sup> duplicated modes were determined based on the study of Wang et al. (2013).

**Supplementary Table S2. List of orthologous groups of the PCLP gene family based on the analysis of representative plant species.** “OG” represents “orthologous group”. “-” represents “Not Detected”.

---

**Supplementary File S1. The gene model for *RcRD21C*.** The coding region is marked with uppercase letters, above which are its deduced amino acids. The transcribed untranslated regions, including 5' UTR, intron and 3' UTR sequences, are marked with lowercase letters. The start and stop codons are marked with bold letters.

```
1 tccatztatcctcttataactcctatcttcttcgagtttaggtcactaaattaattaacattt
1                                                                                               M
61 cttgcaaaatttgcattcctcttataaatatacacataccccaatctcccttactcttcA
2   Y N P L L K N Q N S F H N I S T M A L P
121 TGTATAACCCTCTTCTCAAAAACCAAAATTCTTTCCACAACATATCAACCATGGCATTAC
22   I S L S T L L F L F F T L S S A W D M S
181 CCATATCATTATCAACCCTTCTCTCCTTTTCTTCACTCTATCATCTGCCTGGGACATGT
42   I L S H N H G H H H Q S S W R S D N E V
241 CCATCCTCAGCCATAACCATGGCCATCATCATCAATCAAGCTGGAGAAGTGATAATGAGG
62   I S M Y N W W L A K H S K T Y N K L G E
301 TCATTAGCATGTACAATTGGTGGCTGCAAAGCATAGTAAAACGTACAATAAGCTAGGTG
82   R E K R F E I F K N N L R F I D E H N N
361 AGAGAGAGAAGAGGTTTGAGATCTTCAAGAATAACTTGAGGTTTATTGATGAACACAACA
102  S K N R T Y K V G L T R F A D L T N E E
421 ACTCTAAGAATAGAACATACAAGGTTGGATTGACTAGGTTTGCTGATCTTACTAACGAGG
122  Y R A K F L G T K S D P K R R L M K S K
481 AGTACCGTGCCAAATTCTTGGGCACAAAGAGTGATCCTAAGCGTAGATTAATGAAGTCCA
142  N P S Q R Y A F K A G D V L P E S I D W
541 AAAACCCAAGTCAGAGATACGCTTTTAAGCCGGTGATGTGTTGCCGAATCCATTGACT
162  R Q S G A V S A I K D Q G S C G
601 GGAGGCAGAGTGGAGCTGTTAGTGCGATCAAAGATCAAGGAAGCTGCGgtaagcaatttc
661 tatatcaattactaattagaaaactacatgaaaaatgctacatacagttattagatataa
721 aaaataatagaagattaatcaaggtatctcaatgcaatttttttttttttgagttgcttgg
781 aagaagaatggtggttaattttctggtcatgcagaaaggtagtgagaatggtagttact
841 ggatcttctagttagctagtgattcttttcagattacttataatatatgtagggatt
```

---

901 gtcccataaatgtcacaaaaatataaaaataattataaaaaatattcttgtacatttctgat  
961 aataaaaaataactaaaaacagaatttttataaaaaactctaaaatcgagtcgagttt  
1021 tatttataaaaaatccgatttgattttttcaaattaaagggtatatgttggatatattt  
1081 tgaaaaaaagtatatatattcagtataattttgtaataataaattttaaataatattaa  
1141 tttttataaaatattattgtagtttgattttgtaataattaataatgaataaataaa  
1201 taaataaattttaaagataatttttaaaatgaagatgcattgagaatattat  
1261 atccaaaaactagataaattgctataagataaaaaaaatgtttagtataataatgaaga  
1321 aaaaaagtnnnataaaataaataaaatttaagaaaatcgaacgataaaaaatatacat  
1381 ttgctaataatagtatatttgaagtatttgaaactttttaaataaaataaatttcaa  
1441 ctcaaatgttctaacaatcaaccagtgatgtttcttaaaccatggtatacgttagat  
1501 atgtgtaaaatattttaactaatttgaaaaataaaaaagataaaaaagtaaagaat  
1561 tggtaattatgaaaagtgaagtacttttataatttttaaaaaagataaaataagaat  
1621 ttcctctaataatttaaggtttgagtttgagcccaggatccagagccattaagtcaaac  
1681 acccagatctatatctaaacttctaagtttcagtttgagtccagaccaagttaaagtca  
1741 acttggactaaggctagtgtcaacttaatgagcgagatagcgacccaccaattgggtg  
1801 ccacagttctggattcacggttccattttcattggaaccggatcgaaagaccaattccaa  
1861 gccggtttcagtttacagttatggttcgatcagtttagatatatttaagaaaaaaaa  
1921 agagtttaactcaattatacaattattaataacttattaataattaattacataattat  
1981 taagtattaattacatagcattatattaataaataatttaattgttcttttttaatt  
2041 ttaaggggttggaacctaaatggatagttctgattccatctaaaggaaaatcggacttga  
2101 accgacctccacagtactgagctgattcaagccagtttcaaaattgaccaatttcaagc  
2161 tggttttaaccagctccaatttcgaaccggttcgtggccaccactacacatcaatgttga  
2221 gcgagattcaaaattaacttagttcaatctttagccaatctaattatcaaaataaaaa  
2281 aattattaggaataactcatgtttttatcaaatttatggttttttttccatttttatt  
2341 gtgttaaaaacaattgaaaataattgagaaacaactaataccaacagaaaaagattacc  
2401 aactctaaattttttaaaatataaaactgtacttaaaaaatatttatacaataaaaat  
2461 gatattttttgttaattctaataatattttgaaagattctctataagatttttcggttta  
2521 gatcagcttagttttatcctttttcttgaataatgtgacttaattttgttatcaaatc

---

2581 caactcatatattggaagtacacacaaaaaattatattgaattgcttatgaactttttttt  
2641 tttttttttttgtgttcttatcaaataatttgaattgtttatgaactattctttgtgtt  
2701 tctatcaaaaaaaaaattagactgaacttcaaaattgatacatttttagatgatctgatag  
2761 gtctagtgtggggcacctaattggagttgcataactcttgctataacaaaaagacttate  
2821 aaatTTTTTTTTTAAAAAAAGTTAAACATTATTATGGAAGAGAAATCAGTAAATCAA  
178  
2881 attcaggtactttcagcacaagaataaaataaatatgcaatgccattgtgttggtgcagG  
178 S C W A F S T I A A V E G V N K I V T G  
2941 TAGTTGCTGGGCATTCTCAACAATAGCTGCAGTAGAAGGCGTAAACAAGATAGTAACAGG  
198 E L I S L S E Q E L V D C D R S Y N A G  
3001 GGAGCTAATATCTTTATCAGAACAAGAACTTGTAGACTGCGACAGGTCATACAATGCAGG  
218 C N G G L M D N A F Q F I I N N G G I D  
3061 TTGCAATGGAGGCTGATGGATAATGCTTCCAGTTCATCATCAACAATGGTGGCATTGA  
238 T D K D Y P Y Q A V D G K C D T T K  
3121 CACCGATAAAGACTATCCATATCAAGCTGTTGACGGCAAATGTGACACTACCAAGgtatt  
3181 tgaagtgtatattactaagggtcattgatcacttctaactttttcattgtttgttttgggc  
256 V K N K A V T I D G F E  
3241 gtttattatTTTGGATTGTTTCAGGTGAAGAATAAGGCCGTCACCATTGATGGGTTTGGAG  
268 D V M A F D E M A L Q K A V A H Q P V S  
3301 GATGTTATGGCTTTCGATGAGATGGCCTTGCAGAAAGCTGTGGCACATCAGCCTGTCAGT  
288 V A I E A S G M A L Q F Y Q S  
3361 GTTGCCATTGAAGCCAGTGGCATGGCTTACAGTCTACCAGTCGgtgagttctttccca  
3421 tttctttcaattcttgcagagaaatgagtttcttcttcttatctatTTTCTGAAACAT  
3481 tagttatcaaagtaattgcagaaagTTTTTAAATCTCTTTTGGAGAGATAACATTGGT  
3541 gagacatggaagtgggtgtcattttgcttgtatgttaaacaccaattgagtagaaacgtt  
303 G V F T G E C G S A L  
3601 gagttagttttcttttaattttttcagGGTGTATTCACTGGTGAATGCGGATCAGCCCTA  
314 D H G V V I V G Y G T E D G I D Y W L V

---

3661 GACCATGGAGTGGTTATTGTTGGCTATGGAACAGAAGATGGTATAGATTATTGGCTTGTT  
334 R N S W G R D W G E N G Y I K M Q R N V  
3721 AGGAATTCATGGGGCCGTGATTGGGGTGAAAATGGATATATCAAAATGCAGCGTAATGTG  
354 V D T F T G K C G I A M E S S Y P I K N  
3781 GTTGACACATTTACTGGCAAATGTGGAATTGCGATGGAGTCTTCGTATCCAATCAAGAAT  
374 T Q N P V K I S S V \*  
3841 ACCCAAAATCCTGTAAAGATCAGCAGTGT**TGA**atattgtccttttggttctctgtaaagc  
3901 aaagggcaccaagagaaggaaaaacaagaagatcaaaggtgcaaaatcttatccttctt  
3961 cttagtctaaagggcaagaaggcgttatgcgattgtatgaatgattggtgtgtatataa  
4021 gctttgaatgtgtcaaacagcaccttaaaaatgagctgatcgtggaatctggattgcat  
4081 tttctctgaagttgattgttctaataaaaacttaccgagcacataaatatgcagtcgttat  
4141 cttttctgcatttgtaattgcttgctagctgaattgcttaatagaccaaaggtgcctag  
4201 gcagtagggccaggctcagtagacaccaagaggagagagttagtgagacagggcacaat  
4261 ttcttctctgaaaccaaacaaatcaacaagaagaagaacccaaaagagcgagcaaaga  
4321 tctccatcaaaatgcatgatttcttctccaactttctacatgtgcaataaagttaaacia  
4381 acttgctatctgtaagcttttagaattcttttttatattgataattgccaactttttcag  
4441 tccaaaaacaatatcccatgacttcttttaggcattggctatgttaagttagaaacgca  
4501 cacaaaaaaaaaacaatgaagcattaagtttgcttgatagataaggtgcctactatcaat  
4561 tccatcatcagactggaagcggctcttacaaggggcaacttttgtttttctgttattat  
4621 tatttttcttttaattggttgccgcgcttagagatggat



---

**Supplementary File S2. The gene model for *RcXCPI*.** The coding region is marked with uppercase letters, above which are its deduced amino acids. The transcribed untranslated regions, including 5' UTR, intron and 3' UTR sequences, are marked with lowercase letters. The start and stop codons are marked with bold letters.

```
1 tctattattactttatcaatatgcttatgtccctaaagcagaccaacaatcttggggcaa
61 aagcgtacccaaaaagaaccaaccgtaaagattcgggatgcattgaaaattaatttcagct
121 acttcacttttaagcaatttaagaaattaaacctgtatataactgctgcccggtcctcct
1
M A P
181 ccattcttcattcatcctaaccctcccttaccattaagcctcaacctaaataaATGGCTCCC
4 S V S S I F L F T I F T S L V I C S V V
241 TCAGTTTCAAGCATTTTCCTTTTACCATTTTACATCTCTCGTCATCTGTTTCAGTTGTT
24 A H D F S I V G Y S P E H L T S M H K L
301 GCTCATGACTTTTCTATTGTGGGTTACTCGCCGGAGCACTTGACTTCCATGCATAAACTC
44 T E L F E S W M S K H G K T Y E S I E E
361 ACCGAGCTCTTCGAATCATGGATGTCTAAGCACGGCAAAACCTACGAAAGCATTGAAGAG
64 K L H R L E V F K D N L M H I D R R N R
421 AAGCTACACAGACTCGAGGTTTTCAAAGATAACTTGATGCACATCGATCGTAGAAACAGG
84 D V T T Y W L A L N E F A D L S H E E F
481 GATGTTACGACCTACTGGCTTGGCGTGAATGAGTTTGCAGACTTGAGCCATGAAGAGTTC
104 K S K Y L G L N T D A P R G R I S E D L
541 AAGAGCAAGTACTTAGGGTTGAACACCGATGCTCCCAGGGGGAGAATTTCTGAAGACTTA
124 S Y R D V I D L P K S V D W R K K G A V
601 AGTTACAGAGATGTAATAGACTTGCCCAAATCCGTCGACTGGAGAAAGAAAGGAGCTGTT
144 A P V K N Q G S C G S C W A F S T V A A
661 GCTCCAGTCAAGAACCAAGGCTCGTGCGGCAGCTGTTGGGCATTCTCAACAGTTGCAGCG
164 V E G I N Q I V T G N L T S L S E Q E L
721 GTTGAGGGCATAAACCAGATTGTGACCGGAAATTTGACTTCACTGTCCGAGCAGGAGTTG
184 I D C D T S F N S G C N G G L M D Y A F
781 ATCGACTGCGACACGTCTTTAACAGTGGCTGCAATGGAGGCCTCATGGATTATGCATT
```

---

204 D Y I V N N G G L H K E E D Y P Y L M E  
841 GACTATATCGTCAACAATGGAGGACTCCACAAGGAGGAAGACTACCCATACCTAATGGAA  
224 E G T C D E K R  
901 GAAGGCACTTGTGATGAAAAGCGGgtaaaaggcattgcaaaaaccattgttttacagta  
961 taggctaattctaaactggactcaattgtcaaatgactagtaaaattgtgctaacatttc  
232 E E M E V V T I S G Y H D V  
1021 tatggctattgtcttcagGAAGAGATGGAGGTAGTGACTATCAGTGGTTACCATGATGTG  
246 P E N N E E S L L K A L A H Q P L S I A  
1081 CCAGAAAACAACGAAGAAAGCCTCTTGAAGGCACTAGCTACCAACCTCTTAGCATAGCT  
266 I E A S G R D F Q F Y G R  
1141 ATTGAGGCTTCTGGGAGAGATTTCCAGTTCTACGGCAGGgtaagaaaattgacatgcaca  
1201 cacacacacatctgataaatttcgtagcgggtaagaccacatttcagaaaaatttctaa  
279 G V F N G P C G T D L D H G V  
1261 acagagggatctggcagGGGGTATTCAATGGACCTTGTGGGACAGATCTAGATCATGGAG  
294 A A V G Y G S S K G L D Y I I V K N S W  
1321 TAGCCGCAGTCGGATATGGATCGTCAAAGGGCTAGATTACATCATCGTGAAGAATTCCT  
314 G P K W G E K G Y I R M K R N T G K P E  
1381 GGGGACCAAAGTGGGGTGAAAAAGGCTACATACGAATGAAGAGAAACACAGGAAAACCAG  
334 G L C G I N K M A S Y P T K K K \*  
1441 AAGGCCTATGTGGGATCAACAAAATGGCTTCATATCCTACTAAAAAGAAGTAAcacagca  
1501 gggttgacaacatagatatttcctttctttctgatagctccttcattgatcaaaactttctt  
1561 aatccttgttggtactcttatcaataaaatcagatagaaaattcacatccctcaaactct  
1621 tgtgctattaaaaagtagataatggcattacacatgtaacaagaatgcagacaagagga  
1681 tgtgcatgcttatgtgcacaacaatcatgtttctaacagagagtcaataaaataaaga  
1741 tgcagatgagcatgaatagcaaaatgaagttctatataatcagggtttatttaacttcttt  
1801 attaattcaatgatcataaattagtagtaatacatgcaagtttaaggtgacaaggacct  
1861 aaaacatgtgtatattgatgattggetgctaatttaatggtttaacgatagagcagaaca  
1921 agtatcttaactcaaaacctcattgtacttgaaaacacagtcataaagccggcctccaag

---

1981 aaactgggcaacctctggatgtttcacc

---

**Supplementary File S3. The gene model for *RcXBCP3*.** The coding region is marked with uppercase letters, above which are its deduced amino acids. The transcribed untranslated regions, including 5' UTR, intron and 3' UTR sequences, are marked with lowercase letters. The start and stop codons are marked with bold letters.

```
1 ccacgttttttaggcagccaatccaataaaaagaaaatacacgcccatactaaaaaggcaa
1                               M N F L S A
61 gattcccttttatttctccgagagaaaaataagaaaaagaaaaATGAACTTCTTTCTG
7  L F L I T L L F F N L S I S S F S S S S
121 CTCTTTTCTTGATCACTCTCCTCTCTTTAACCTTTCTATTTCTTCCTTTTCTTCTTCTT
27  D I S K L F E S W T K E H G K T Y T S K
181 CTGATATCTCTAAGCTCTTTGAGAGTTGGACCAAAGAACATGGAAAAACATACACTTCAA
47  E D K L Y R F K I F E E N Y E F V K K H
241 AGGAAGATAAGTTGTATAGATTCAAAATCTTCGAGGAAAATTATGAATTTGTAAAGAAAC
67  N S Q G N S S Y T L S L N A F A D L T H
301 ATAACAGCCAAGGTAATTCTTCTTATACCTTTTCTCTCAATGCCTTTGCTGATCTCACCC
87  H E F K A S R L G L S A F S T S G K L S
361 ACCATGAATTCAAAGCTTCTCGCTTGGGCTCTCTGCTTTTCAACCTCCGGGAAGCTTT
107 R R N F P L H D F V G D V P I S I D W R
421 CCCGTCGGAATTTTCCATTGCATGATTTGCTTGGCGATGTTCTATATCAATTGATTGGA
127 K K G A V S Q V K D Q G N C G
481 GAAAGAAAGGGGCTGTTTCTCAGGTCAAAGATCAAGGGAATTGCGgtgcgtgcatcctttt
541 atttggattcctttatcttttttatgcttaatttttgatgagttttgaaactactctagt
601 ctttctttatattgatccatgagcatcgtgcatacttagttttgaaactcttgtgtgatc
661 tttattatcatttattagtagtaatctcttaactctgtttttccttctactattaaact
721 tgggaatcatgtaagaattgcagccatcttattttattagatttcgtaatatagtctagta
781 cctcagcatgctgtataaccggcatttgattttgattgttttgcataatgaaatatacatct
841 ctctatatttcttaacgtattccaaaaggatttgccacctttataattttaaatcc
901 tcatcaaagagatggtggcttgtgaaaaatgctttcatttatagatttgttttaccttga
961 aagttttctccttttttagttttgattgcagtgaagttcagttcttcacaattttttctca
```

---

1021 tgcactatatttttcttctgatattcttagttaagacttccatcttgactgaaatcatca  
1081 agttagtactattttcttggtgcgttcttagttatcaagactttcactttgactgaaatca  
1141 tcaagttctacaattgactgtaatctggttaaattcattctactatgactaaatgatatat  
1201 atatggccataattgtagctgtttttgactggtaaattgcagatacatctatttcatgg  
142 A C W S F S A T  
1261 tgcttaagaataaattgtttactgtattacgcagGTGCTTGTGGTCGTTCTCAGCCACA  
150 G A I E G I N K I V T G S L V S L S E Q  
1321 GGAGCTATTGAAGGCATAAATAAGATTGTTACTGGATCTCTCGTTAGCCTCTCGGAGCAG  
170 E L V D C D R S Y N N G C E G G L M D Y  
1381 GAGTTAGTTGATTGCGACAGATCTTACAATAATGGTTGTGAGGGTGGACTAATGGACTAT  
190 A Y Q F V I E N N G I D T E E D Y P Y Q  
1441 GCCTACCAGTTTGCATAGAAAACAATGGGATTGACACTGAGGAAGATTATCCATATCAA  
210 A R E K T C N K E K  
1501 GCACGGGAAAAGACCTGCAACAAGGAAAAGgtaattattttatttccatttgccttctt  
1561 cacctataaactctcaattcagttcccactcttccgtgttcacatcattgtctatgttga  
220 L K  
1621 ttcactctctgtttctcgtttcattccggtagtcctaatttatacacattgcagTTGAAA  
222 R H V V T I D G Y T D V P Q N N E K E L  
1681 AGGCATGTGGTAACCATTGATGGATACTGATGTGCCCAAACAATGAGAAAAGAGTTA  
242 L K A V A A Q P V S V G I C G S E R A F  
1741 TTGAAAGCGGTTGCAGCTCAACCTGTAAGTGTCGGTATATGCGGCAGTGAGAGAGCATT  
262 Q L Y S K  
1801 CAGTTGACTCAAAGgtagtttttgatagttaatatcaatgaccatttactatagacag  
267 G I  
1861 caaaaaaaaaattggtagtgatttttaagtggtttaattatttgtatgatagGGAATT  
269 F T G P C S T S L D H A V L I V G Y G S  
1921 TTCACTGGTCCATGTTCAACTTCTTTGGATCATGCTGTATTGATTGTAGGATATGGGTCA  
289 E N G V D Y W I V K N S W G T H W G I N

---

1981 GAAAATGGTGTAGATTATTGGATTGTGAAGAACTCATGGGGAACACACTGGGGAATAAAT  
309 G Y M Y M L R N S G N S Q G L C G I N M  
2041 GGTTATATGTACATGCTACGCAACAGCGCAATTCTCAAGGGCTCTGTGGTATCAACATG  
329 L A S F P V K T S P N P P P P A P P G P  
2101 CTGGCTTCATTTCCAGTGAAGACCAGCCCTAATCCCCCTCCTCCAGCTCCACCAGGACCC  
349 T K C D L F T R C G E G E T C C C T R R  
2161 ACTAAATGTGATCTTTTCACTCGATGCGGAGAAGGGGAAACTTGCTGTTGTACTCGCCGC  
369 I F G L C F S W K C C E L D S A V C C K  
2221 ATTTTTGGATTATGCTTTTCGTGGAAGTGTGCGAATTGGATTGAGCTGTGTGTTGCAAG  
389 D G L H C C P H D Y P V C D T K R N M C  
2281 GACGGGCTCCACTGTTGCCCCATGACTATCCAGTTTGCACACAAAAAGGAACATGTGC  
409 L K  
2341 CTTAAGgtcagcatattctctgccttcaatctgctagctgtttgattgtgtgatgcacat  
2401 aaaactatcaaagctagggcatgattatactgtcgtttgaatttcttctgaacattaaatt  
2461 gcttccttgacattcttccttttatTTTTgtaacttcaaagatcttactctctggtggaa  
2521 atgatagaattgcatgggttgctttttgtttatcccacgtgatgttcaatactgtggat  
2581 aaaaccacaaatttgatagagttgatttatcatttttagctaaaatctatctgatgttggt  
2641 attctataaagtgaattaaagcttgaattaaagtttgcttccagtagactgatactgct  
411 F P G N A T R M E T V A K K S S S  
2701 tatgcttgcagTTCTCTGGTAATGCCACAAGAATGGAAACAGTTGCAAAGAAAAGCTCCT  
428 G M F G S W N S L L E G  
2761 CTGGGATGTTTGGCAGTTGGAATCCCTTCTTGAAGgttgattctgtaaaaccattttc  
2821 atttattctggcgagtgatttaattttttcagaaaaacccttgtagaagttgcatgttt  
2881 cacaattgaaggaggagactttctagatttagagcgtaaaattttgtgtacaccccaga  
2941 agttgtattgtttagcttgtgtgtagagagattttctggtgcatggcattgttttacaat  
3001 ggggggatggatttaagaaggaattaaggaggtgagcttggcattgtttcttttcta  
3061 gaggcatgaatttaagaattgattaggattttccttatcctagatataagactgcttt  
3121 tagcatatgtctttcgtatgtctgtacgtatattacgtctcccagctgcttacctgcat

---

3181 ctttatttgtgtgcatcaattgcttgaatattagatataaagatatectatcagctagtt  
440 T A I A K G  
3241 ttgatatgtaagcgagtagataagcaaacctctatgaacagGTACAGCTATTGCAAAAGG  
446 H P R I A G V I V C Q D N I I S F R H Q  
3301 CCACCCTAGGATTGCTGGAGTAATTGTGTGCCAAGACAATATCATATCCTTCAGGCACCA  
466 N \*  
3361 AAATTAAaacacacgcaaaaaaaaaatgaaaaagaacaccagaaaagaggtgagaacatca  
3421 ttctgcctggataattaggggttgctgcagggaccttgatgatttctctctagacctgctc  
3481 atgggcatgaaaaacaagccctgtgcacctagacagaactcttttaacaactggcagtg  
3541 tgaatgtgaattaccataagagtcceaattggaactgttgacttcttcagtatcgaa  
3601 ctcttcacccaaatattatcaggcactctgtccagttctgccattgatgatgagtctctgc  
3661 cattgatgatcgtcgtttatcaaatttgtaaactgccaagtagtaaatgagaatatga  
3721 tgctgttcagcctgagacataattcaatcattcacataactcttcattaa

---

**Supplementary File S4. The gene model for *RcXBCP3L*.** The coding region is marked with uppercase letters, above which are its deduced amino acids. The transcribed untranslated regions, including 5' UTR, intron and 3' UTR sequences, are marked with lowercase letters. The start and stop codons are marked with bold letters.

```
1                               M G S Q K I
1 ggtagatcaaagaaatcatcaccggaacccaatttgaggaaaATGGGTCCCAAAAGAT
7  Q F L I I F L L V G P L T C L S F T L P
61 CCAATTCCTGATCATTCTTGCTGTAGGTCCACTAACATGCCTATCTTTACCTCCC
27  D E Y S I V G N D L H E L L S E E R V K
121 AGATGAATACTCTATAGTGGGCAATGACCTTCATGAGCTGCTATCTGAGGAACGTGTCAA
47  E L F Q Q W K E K H R K V Y K H V E E A
181 AGAACTCTTTCAGCAATGGAAAGAAAAGCACAGAAAGGTTACAAGCATGTAGAGGAAGC
67  E K R L E N F R R N L K Y V V E K N Q K
241 AGAAAAGAGGCTAGAAAACCTTCGAAGGAACTTGAAGTATGTAGTGGAGAAGAATCAGAA
87  K K N L G S A H T V G L N K F A D M S N
301 GAAGAAAAACTTGGGCTCAGCGCATAACAGTTGGATTGAATAAGTTTGCTGATATGAGCAA
107 V E F R Q K Y L S K V K K P I K K R N N
361 CGTGGAGTTTAGGCAAAAGTATCTTTCAAAAGTGAAAAACCCATCAAGAAACGGAACAA
127 N L M T S R Q R N L Q S C V A P S S L D
421 TAATTTAATGACCAGCAGGCAGAGAAATTTACAATCATGCGTTGCTCCTCAAGCTTGGA
147 W R K K G V V T P V K D Q G D C G
481 TTGAGAAAGAAAGGAGTTGTTACTCCAGTTAAGGATCAAGGAGATTGTGgtatgtttct
541 ttaatttctttctttgttattttctttataattatattatctgttttattttcagttgc
601 tgttgtattggacttagtggataactaattaatttgaaaaaagaattcaaatc
661 ttttgaatgcaacgaagatcataataaattaagtaataagattccttgaatgtcatgttgac
721 agataatcttaatttttaatggaatatccaaagatttagtctgtttttattagtaaaagtt
781 ttattttaaattgcaatgctgctttataagtaatttcatataattattatgagaaagagag
841 tatctaattgcttaaatttaaggttgcttagatgaataaagatggtttataatttcagat
901 ctaaaggaaagaagagtctggtttgactggttaggtacgcactagggttgaatcagtgctc
```



---

961 tattagattccttgctggggtgtgtataaaaagtaatttgagtgaaagtaataataa  
1021 taataattaatcggatgggtgtatctgtaagactttttaactgtaaatthaagaatattat  
1081 ttttagaaatttcgtttctttataattaagtgattattacactgttttaatttaa  
1141 aaaacatttataaagtgaagtaacaaaagaacagacatttaattgcaaatttaagcat  
1201 tttagttttagtaattttatttttagactttatcattaagtgattattactgtttttagtt  
1261 taaaaaacatttataagcgaaagataataactgctcaattggctatatgcttccatcc  
1321 acctgcatatTTTTGTGTGGTCAAAAAGGAAAACATTTCAAAAAAAGGTCCAAC TAGA  
1381 tatagagaaattctaaagaaaaagcagatatgtttctcattgcacctaaagtatatatta  
1441 ataagtatgagttgtttggataaaataaatttttaaacttttttgataagttatgt  
1501 agtttatgatttgataaatttttttagataaaataaaatacattaaaaaattttacta  
1561 ttaaaaaatatcaatttctagagatttaattttttactttaatcaactattattatca  
1621 tattaaatatatttgctttaacaattcaaaaatattaccgtgtgattgtcaagttggtct  
1681 cgtcagaccaatgacttcttaaatcacaatttgacaattaattaataaaattatgaatta  
1741 gtttctaaactattaaacatgtgaaaacataataataataataataataaacct  
1801 gattaaagtgaaaatagtttcttcttgctatccaaagtttttaacagtaaaacacat  
1861 ttactgctatacattataaccacatttttcttttaactaagaaaaatacattaaaaat  
1921 cataaaacagaacaagtacagtttaatactttatctacattattaattttatgaagttaa  
1981 aaattacagtttaaatcttaagtgacaagaaaatttgatgtggaaagtaaacgttacc  
2041 ttttgcatcacctatgttattgcttttatcatgagtatacagtttaatactttatctaca  
2101 ttaggtgaattattaattttatgagcctctttatataatctcgtaattattgggatttcat  
2161 gaactaaaaaaataaaaagtaatagaaatatctatttgctttattttttaatcaaattta  
2221 caatattttttattttattatgttaaggtattaaaaaatatgatttttttaaaaattag  
2281 aattttttatttcttttgtttgttttgagcaaaataattaaaaataaccgaaaaataat  
2341 tatactataaatttgnnnnnnnnnnnnnnnnnnnnnnnnnnnnnnnnnnnnnnnnnnn  
2401 nnnnnnnnnnnnnnnnnnnnnnnnnnnnnnnnnnnnnnnnnnnnnnnnnnnnnnnnn  
2461 nnnnnnnnnnnnnnnnnnnnnnnnnnnnnnnnnnnnnnnnnnnnnnnnnnnnnnnnn  
2521 nnnnnnnnnnnnnnnnnnnnnnnnnnnnnnnnnnnnnnnnnnnnnnnnnnnnnnnnn  
2581 nnnnnnnnnnnnnnnnnnattatactataaatttgaaaaaggagacagtattttaaaag

---

2641 aaaattatacagtaaaaacaatattctttttattgattttaaggtattttaaatatTTTTG  
2701 aaaaaattcctaaaaaacatacagcttaaatttttgaaatcaccggattgatcctggcag  
2761 ctcaacgaacaagtctaataacacttcagcatcctaactaaattattgaaacttgcaagt  
2821 accaaaatactaaattagtggtgctcctgcttcattttaactaaaactgatcaatattcg  
2881 gatattcttactcgtccacaagcttattaacagtttcatttttttaagtgtttgtttt  
164 S C W A F S  
2941 aggtgttttgtaattgaggtccttggttggttaattttgcagGAAGCTGTTGGGCATTCTC  
170 S T G A I E G I N A I V T G D L V S L S  
3001 TTCCACTGGAGCAATCGAAGGAATAAATGCCATTGTCACCGGAGACCTCGTTAGCCTTTC  
190 E Q E L M D C D T T N Y G C D G G Y M D  
3061 TGAACAAGAACTTATGGATTGTGATACAACCAATTACGGTTGTGATGGTGGCTATATGGA  
210 Y A F E W V I N N G G I D T E I D Y P Y  
3121 CTACGCTTTTGAATGGGTTATAAACAATGGTGGGATTGATACAGAAATCGATTATCCTTA  
230 T G V D G T C N I A K  
3181 TACAGGTGTGGATGGTACCTGCAACATCGCCAAGgttcgtttccttcgtgttctatata  
3241 acccactagaagatgattataatatcttttcttcgtcttacttgtggtgttcttgtgttt  
241 E E T K V V S V D G Y E D V A E S D  
3301 gatcagGAAGAAACAAAAGTTGTATCCGTTGATGGATACGAAGATGTAGCTGAATCAGAT  
259 S A L L C A T V Q Q P I S V G I D G S A  
3361 AGTGCTCTCTTGTGTGCTACTGTTACAGCAGCCTATTAGTGTGGTATCGATGGTTCTGCA  
279 I D F Q L Y T S  
3421 ATAGATTTTCAACTGTACACAAGTgtaagtcctcttttcattttatgagtagcaccctaaa  
3481 aaaaaaaaaaaaaaatcaaaagatacttaagaagtgattatgacatgaaagatgatgtg  
287 G I Y N G S C S D N P N D I D H A  
3541 atttaaatcagGGAATCTACAATGGTAGTTGCTCTGATAATCCAAATGACATTGATCATGC  
304 V L I V G F G S E D G E D Y W I V K N S  
3601 TGTTTTGATCGTTGGATTTGGCTCTGAAGATGGTGAAGATTATTGGATCGTGAAGAATTC  
324 W G T E W G I N G Y F Y L L R D T N L P

---

3661 ATGGGGCACAGAATGGGGAATAAACGGATATTTCTATTTATTAAGAGACACTAATTTGCC  
344 Y G V C A V N A M A S Y P T K E S S A P  
3721 ATATGGTGTGGTGCAGTCAATGCTATGGCCTCTTATCCCACTAAAGAATCCTCTGCACC  
364 S P T S P P S P P S P P P P P P P P T P V  
3781 ATCCCCGACTAGTCCTCCATCACCACCATCACCCCTCCACCTCCACCCCAACACCAGT  
384 P P P P S P S P S E C G D F S Y C P T D  
3841 GCCCCACCTCCCTCACCTTCACCAAGTGAATGTGGCGACTTCTCTTATTGTCCAACCTGA  
404 E T C C C L Y E F F D F C L V Y G C C P  
3901 CGAGACATGTTGTTGCCTTTATGAATTCTTTGATTTCTGCTTAGTCTACGGTTGCTGTCC  
424 Y E N A V C C T G T E Y C C P S D Y P I  
3961 GTACGAGAATGCTGTTTGCTGCACTGGCACAGAATATTGTTGCCCCAGTGATTACCCAAT  
444 C D I K E G L C L Q  
4021 TTGTGATATTAAGAAGGGCTCTGTCTCAGgtgagaactcatagccattaatatctgag  
4081 aattgcctctttctagcgtgaataacgagctatttagttcaaaatacttgcaagttacgaa  
4141 ttattaagccattattcaatcagttgattgaatggttaacctttctttttccaaaattgt  
454 N Q G D Y L G V A A T K K H M A K  
4201 gtatgcaacagAACCAAGGAGATTACTTGGGAGTAGCTGCAACGAAGAAGCATATGGCTA  
471 H K L P W S K L E E S K R E R T Y Q P L  
4261 AACACAAGCTTCCCTGGAGCAAGCTAGAAGAAAGCAAGCGAGAGAGAACATACCAACCTC  
491 M W K R N P F A A I R \*  
4321 TCATGTGGAAGAGGAACCCCTTTTGCTGCAATTCGCTGAaagaagaaaagctgatggccccg  
4381 ttaagtaattgaaggtcttcgcaattattttaattaaatttaccgcataggcagacattc  
4441 agtaatcctgctacaattattggtttatgaacattaaacgaatgtagcaagaaaaactag  
4501 aagtaaagaagaaaaggggaaattgagtatggcgttctcttgatgatcgactggatgga  
4561 aactggatttgtagtaagacttctttcatgtatctttctcatggcttacagetcatttca  
4621 agccatgctctgtattggtgtccaggacttgtaataacttcagtatatggttttaaaat  
4681 aagagattctgtttggaagtttacttgatttcaatttcagaaaactgatctttac

---

**Supplementary File S5. The gene model for *RcPAP3*.** The coding region is marked with uppercase letters, above which are its deduced amino acids. The transcribed untranslated regions, including 5' UTR, intron and 3' UTR sequences, are marked with lowercase letters. The start and stop codons are marked with bold letters.

1 M A L S L E K K L A I A L L V V F S T W  
1 **ATG**GCTCTATCACTTGAAAAGAAACTCGCGATTGCCTTGTGGTGGTTTTCTCGACATGG  
21 A S Q A M A R Q L I N E D A L V E K H E  
61 GCATCTCAAGCCATGGCCCGACAGTTGATCAATGAAGATGCCCTCGTTGAGAAGCACGAG  
41 Q W M A R H G R T Y Q D S E E K E R R F  
121 CAATGGATGGCTCGCCATGGGCGCACTTATCAGGACAGTGAAGAAAAAGAGAGACGGTTT  
61 Q I F K S N L E Y I D N F N K A S N Q T  
181 CAGATATTCAAGAGCAACTTAGAGTACATTGACAACCTCAACAAGGCCCTCCAATCAGACT  
81 Y Q L G L N N F A D L S H E E Y V A T Y  
241 TACCAGTTAGGTCTCAATAATTTTGCAGACTTATCCCATGAAGAATACGTTGCTACTTAC  
101 T A R K M P V L P T A N T T T K T T L F  
301 ACTGCACGCAAGATGCCCGTACTCCCTACAGCAAACACCACAACCAAGACAACGCTATTC  
121 N S D D I N Q V E V P E S I D W R D H G  
361 AATAGTGATGATATTAACCAGGTTGAGGTTCCGGAGAGTATTGACTGGAGAGACCATGGC  
141 A V T P I K N Q Y Q C G  
421 GCTGTCACCCCTATTAAGAACCAATACCAATGTGgtaacatctcatctctctttacgtta  
481 tatatatatataaaattaagtgggaattattaatgaattcaacgggtttatttagttgag  
541 aagtgaatttgcttatacaaaaatagtaaaatatatgtaaaactttctaaaagaatcactg  
601 acttggagatgtcaatctagtatttgaaatgggtaccaactaaataaagagtttctgtct  
153 C C W A F  
661 ttctttgactgattaccctccttatatattgtgtattgcacgcagGGTGTGCTGGGCAT  
158 S A A A A V E G I V A N G V S L S A Q Q  
721 TTTCAGCGGCGGCAGCCGTGGAAGGGATCGTAGCTAATGGTGTCTCACTGTCAGCTCAAC  
178 L L D C V S D N Q G C K G G W M N N A F  
781 AATACTAGACTGTGTGAGTGATAATCAAGGTTGTAAGGGGGTTGGATGAATAATGCTT

---

198 N Y I I Q N Q G I A L E T D Y P Y Q Q M  
841 TTAATTACATAATACAAAACCAGGGCATAGCCTTAGAAAACGGATTACCCGTATCAACAAA  
218 Q Q M C S S R M A A A Q I S G F E D V T  
901 TGCAACAAATGTGCAGTTCAAGAATGGCTGCAGCCCAGATAAGTGGTTTTGAAGATGTAA  
238 P K D E E A L M R A V A K Q P V S V T I  
961 CTCCAAAAGACGAGGAAGCCCTGATGAGGGCAGTAGCAAAGCAACCTGTATCGGTCACCA  
258 D A T S N P N F K L Y K E G V F T A A G  
1021 TTGACGCTACTTCTAATCCAAACTTCAAATTGTACAAAGAGGGAGTGTTCCTGCAGCAG  
278 C G N G H S H A V T L V G Y G T S E D G  
1081 GCTGCGGGAATGGACATAGCCATGCTGTGACCTTAGTTGGGTATGGGACAAGTGAAGATG  
298 T K Y W L A K N S W G E T W G E S G Y M  
1141 GGACCAAGTATTGGCTAGCCAAGAATTCATGGGGTGAGACTTGGGGAGAAAGTGGTTACA  
318 R L Q R D I G L E G G P C G I A L Y A S  
1201 TGAGGTTGCAGAGAGATATTGGTTTAGAAGGAGGTCCTTGTGGCATTGCATTGTATGCTT  
338 Y P T I N \*  
1261 CGTATCCTACCATTAATTAGaccgctctatctaagaatattacaacatgcataaaataa  
1321 aagaaaagac

---

**Supplementary File S6. The gene model for *RcCTB1*.** The coding region is marked with uppercase letters, above which are its deduced amino acids. The transcribed untranslated regions, including 5' UTR, intron and 3' UTR sequences, are marked with lowercase letters. The start and stop codons are marked with bold letters.

```
1 cttgctttgtactatctatctgtatctaccaataaattaatcaaagcctcattaaccgaa
61 cacactttccttattcgacgtttactatatagctccttctgacctgttgatactgcggc
1 M A A S I L S S F A L L L
121 agttgctttggagaagcaaaaATGGCAGCTTCTATCTTATCCTCCTTCGCTCTTTGCTG
14 F L V A L S S F H S R
181 TTTCTTGGCTCTCTCCTCTTTTCACTCCCGGgtacctattattggtgttattagatt
241 tcttttgtctggttataaagtttctgatcgtgctgattaaattagttttggatttgaa
301 attaagaatgacgagattgttttaactcatcgatttcgatttctgtagcttgaatttaag
361 agttgatgaagtattttcaacggattgatttcgattttgtacctatgtcatctgtgccga
421 aagtaaaatttcatgtaaccgaagttttatttgaactaaaaatgtaaaggaacgtacct
481 tttatgctactgtgatgatcacctctctaataagcactgtaaagccacatgaatttatct
541 tatataggagtgttagagtttggatttatgttgcgctttttgttgcgtgttgttct
601 tgtgcttgctcctttgcataccctgataagaggaggatgttcattcttgaatgttcttca
661 aatcttgttctgagttttgattcttttggagttactgttgactttttaacatectaa
25 V I S T E L D S K L K L N
721 atgctgttgacactgtcaacagGTGATCTCAACAGAACTAGATTCCAAGCTGAAGCTGAA
38 S R I L Q
781 CTCTAGGATCCTTCAGgtatTTTTCTTgctgccgatcattggaatccaaaagctttatt
43 E S I I K
841 ctgtagagcaagtcatttaattgcttttctgacttcgacgagcagGAGTCAATAATTAA
48 K V N E N P D A G W E A A M N P Q L S N
901 GAAAGTAAATGAAAACCTGATGCTGGATGGGAAGCTGCCATGAATCCTCAACTTTCAA
68 F T
961 CTTCACTgtgagctttaactcatcagaggccaacatcttttctaagtccatttgtctac
70 V G Q F K Y L L G
```

---

1021 agttaacacatacttctatattttgctgcgtagGTTGGCCAATTCAAGTATCTTCTTGGA  
79 A K P T P K K E L M G V P M I S H P K T  
1081 GCCAAGCCAAC TCCAAAAAGGAACTGATGGGTGTTCCCTATGATAAGTCATCCAAAAACC  
99 L K L P K E F D A R T A W P H C S T I G  
1141 TTAAAGTTGCCAAAAGAATTTGATGCAAGAACAGCTTGGCCACATTGCAGTACCATTGGA  
119 K I L D  
1201 AAAATTCTAGgtcagctgctttctttctataatataattttcaattttcttcttcttttt  
1261 cttgaggtgctgatgtttccactatgtatgccaaatgcttgattctggatcaatttcctc  
123 Q  
1321 atcaaagATCAGgtaaaatctggttctattgttttctcagtcactcactcaacatgagt  
124 G H C G S C W A  
1381 tctacatattctgagttcgtctgtatatgacaatccagGGTCATTGTGGATCCTGTTGGG  
132 F G A V E S L S D R F C I H F G M  
1441 CATTGGTGCTGTTGAATCACTATCTGATCGATTTTGTATCCATTTTGGCATGgtaacta  
1501 gctagctatattcactaaatctcctgttaaacttcactagctgtgttgcattacaaac  
149 N I S L S V N D L L A C C  
1561 atatcttttgtttggccacagAATATATCATTGTCTGTCAATGATCTCTTGGCATGCTGT  
162 G F L C G D G C D G G Y P M Y A W R Y F  
1621 GGCTTTTTGTGTGGAGATGGTTGTGATGGAGGGTATCCGATGTATGCATGGAGATACTTT  
182 V H H G V V T E E  
1681 GTCCACCACGGGGTTGTCACTGAGGAGgtacaaatttctgtgtttgcctgtttccttgg  
1741 tcttctgttttcccctgcactggagattgttaaattggaagctaagggttcttghtaatgt  
1801 catgtttctttttgatgacttcatgaatataattatttgatgcaatggetttcttctt  
191 C D P Y  
1861 gtttttaaatatttcttcttaaaaatctgcaaactgtttacatctgacagTGTGACCCATA  
195 F D N I G C S H P G C E P G F P T P K C  
1921 TTTTGATAACATTGGCTGTTCCACCCTGGTTGTGAGCCTGGATTTCCAAC TCCAAAGTG  
215 V R K C I D K N Q L W R Q S K H Y S V N

---

1981 TGTGAGAAAGTGCATTGATAAGAATCAGCTCTGGAGGCAGTCAAAGCATTACAGCGTTAA  
235 A Y R I S S D P H D V M A E V Y K N G P  
2041 TGCATATAGAATTAGTTCTGATCCCCATGATGTTATGGCTGAAGTTTATAAGAATGGACC  
255 V E V S F T V Y E  
2101 AGTAGAGGTTTCTTTCACCTGTTTATGAGgtaacatatcaattcgtgtcttctgtttgct  
2161 tgcattaacttctttgtatgtgaatataagcttatttcttttgctgttctatccctgctg  
2221 taatccttaaccataattaagtgagctgaagaaatcttgagccagcttcacatgtagatg  
2281 taggaagaacctcaatgggagttttcatatattggatgcctgaaatatgattatcttttc  
2341 catgtatattagatactcgaacttttcatgataatagctcttggtagaattacttttttg  
264 D F A H Y K S G V Y K H  
2401 aagctactgctttgcgttctacagGATTTTGCTCATTATAAATCTGGAGTTTATAAGCAC  
276 I T G E V M G G H A V K L I G W G T S D  
2461 ATTACAGGTGAAGTAATGGGAGGTCATGCAGTTAAGCTTATTGGGTGGGGACTTCTGAT  
296 N G E D Y W  
2521 AATGGAGAGGATTATTGGgtatgcgtgattagctaactttttgcagatatttagctat  
302 L L A N Q  
2581 gaccttataaggatgttggtataattgtgcacttttcttcttgcagCTTCTTGCAAACC  
307 W N R G W G D  
2641 AGTGGAATAGAGGCTGGGAGATgtagttcctataataagtttcttgctgatgaatcac  
2701 gctactttcccttcttttgttttctcttcatecttttattcccctgctetcaaattttc  
314 D G Y F K I R R G T N E  
2761 acaaatttttatttcgaatgacagGATGGTTACTTTAAGATAAGGAGAGGAACAAATGAG  
326 C G I E D D A V A G L P S A R N L D L V  
2821 TGTGGTATTGAAGATGATGCGGTTGCTGGTTGCCTTCAGCCAGAAATCTTGATCTTGTT  
346 R E V A S M D A L E D A F A \*  
2881 AGAGAGGTTGCCAGCATGGATGCTCTTGAAGATGCTTTTGCT**TGA**tagtagatcattgta  
2941 cttgcaagttctgtaatttacgcatcagtcacagagatatgttatgggtgtgt  
3001 ctgctgttcagcatgaaacgaaacatatttatgaatccatgctgtgttggtgcttata



---

3061 tcaactagacatttgttgtgaatgcaagaaaggaacaaatctgtaaataatgtaattgtc  
3121 acacatagtataagagtcaactgctttctgctttcacattgcttttacattaggcactta  
3181 tgaaatgtttggaaggatgtccaaattaataagatagtcctgctttatgaagaaaatggg  
3241 aagtttctgcagaaatagctctaattgtcagtagcataagccctaaccgagagatggaa  
3301 tctaatacgtggtacgccaacagaaggagtacatgtggcggctagcaagcgagtcaaat  
3361 actgtttaaggataaggtagtgactcttccttttgctttttcccgagggtgggggcta  
3421 tataggaaaacattgtaggtaataatattttgttttgcacttacagccagcatgttca  
3481 ttgtaggcttagtattccgttttataatgttatattttcccctcatcattccaa

---

**Supplementary File S7. The gene model for *JcSAG12H8*.** The coding region is marked with uppercase letters, above which are its deduced amino acids. The transcribed untranslated regions, including 5' UTR, intron and 3' UTR sequences, are marked with lowercase letters. The start and stop codons are marked with bold letters.

```
1 gaaactgaattttggttgccatatacacaactaacgggattaactcaacataagac
61 tgcaatttcagacatctcttgtaaggaagccaatttatatggtctataaatacatgacag
121 ctctttaaggactagtgtgccaaaaatacacatatacctacattatatactctctagtctt
1 M A S I L E N K L V F V T
181 tacttctctctccaccaagaagaATGGCTTCAATTCTGAAAACAACTGGTCTTTGTGA
14 V L V L G L F A S Q A F A R P L Q N E T
241 CAGTGTTGGTGCTGGGGCTCTTTCATCTCAAGCCTTGCACGTCCTCTACAAAATGAAA
34 M K E R H E M W M A K Y G R V Y K D S A
301 CCATGAAGGAGAGGCATGAAATGTGGATGGCTAAATATGGACGTGTTTATAAAGACAGTG
54 E K E K R F N I F K N N V E F I E S F N
361 CAGAGAAGGAGAAACGCTTTAACATATTCAAGAATAATGTGGAGTTCATTGAATCTTTTA
74 K D G N K L Y K L D I N G F A D L S N E
421 ATAAGGATGGGAATAAGCTTTACAAGCTAGATATCAATGGATTTGCAGACTTAAGTAATG
94 E F K A S R N G Y K R S S I A K S S E T
481 AAGAGTTTAAGGCCTCTAGAAATGGATATAAAAGATCTTCTATTGCTAAGTCATCTGAGA
114 L S F K Y E N V T A V P T S M Y W R N K
541 CGCTGTCGTTTAAGTATGAAAATGTCACCGCTGTCCCAACTTCCATGTACTGGAGGAACA
134 G A V T P I K D Q G Q C G
601 AAGGAGCTGTACTCCCATCAAGGACCAAGGCCAATGCCgtaaggaacacaatgtttctt
661 atttttcttctactatgtactagctatagtaaattaatctaataatgtattttcccttt
147 C C W A F S A V A A M E G I
721 tggaacacacaaatgtagGATGTTGCTGGGCATTTTCTGCTGTGGCTGCCATGGAAGGAA
161 T K L S T G K L I S L S E Q E L V D C D
781 TTACAAAGCTCTCAACAGGAAAATTGATTTCTTTCTGAGCAAGAACTGTTGATTGTG
181 T S G E D Q G C E G G L M D D A F E F I
841 ACACAAGTGGAGAAGATCAAGGCTGCGAAGGGGTCTTATGGATGATGCATTTGAATTCA
201 K K N G G L T T E A N Y P Y Q G T D D S
901 TAAAAAAAATGGAGGACTAACAACTGAAGCCAATTACCCTTACCAAGGAACTGATGATT
```

---

221 C N K R K A V D H A A K L T G Y E D V P  
961 CTTGCAATAAAAAGAAAGGCAGTTGATCACGCAGCAAAGCTTACTGGCTATGAAGATGTGC  
241 A N S E D A L L K A V A N Q P V S V A I  
1021 CTGCTAATAGTGAAGATGCCTTATTGAAGGCAGTAGCCAACCAACCAGTCTCTGTAGCCA  
261 D A S G S A F Q F Y S G G V F T G D C G  
1081 TTGATGCAAGTGGCTCTGCTTTCCAGTTCTACTCAGGTGGAGTATTTACAGGAGATTGCG  
281 T E L D H G V T A V G Y G T S S D G T K  
1141 GAACTGAACTCGACCATGGAGTTACTGCAGTTGGGTATGGCACAAGCAGTGATGGAACCA  
301 Y W L V K N S W G T S W G E N G Y I R M  
1201 AGTATTGGTTAGTGAAGAACTCATGGGGAACTTCTTGGGGTGAAAATGGATACATTAGAA  
321 E R D I D A S E G L C G I A M E P S Y P  
1261 TGGAAAGAGATATTGATGCTAGCGAAGGTCTTTGTGGAATTGCGATGGAACCTTCTTACC  
341 T A \*  
1321 CAACTGCATAAattaaaattaagtggcagaaaagaaaatatgggtcaatcttaaaatataa  
1381 atacattgtccaaaa

---

**Supplementary File S8. The gene model for *JcRD21B*.** The coding region is marked with uppercase letters, above which are its deduced amino acids. The transcribed untranslated regions, including 5' UTR, intron and 3' UTR sequences, are marked with lowercase letters. The start and stop codons are marked with bold letters.

```
1 ctttaccgtaacctgtctttgtacatgtagtaatccgattctaaaaatataaatttctc
61 cctatatatatacgtcaaaagcacaagcaaaatcacccatataccatccgacccaac
1      M A S P G R S L P F F I L C G F L
121 cctacagccATGGCTTCTCCTGGAAGATCTCTCCCTTTTTTCATCCTATGTGGGTTCTT
18 F F S S L A L D M S I I D Y N I R H G Q
181 TTTTTCTCTCTTTAGCGCTGGACATGTCGATTATTGATTACAATATCAGGCATGGACAA
38 N P E E R T D A N V R R I Y E M W L V K
241 AACCCAGAAGAAAGAACAGACGCTAATGTTTCGGAGAATCTATGAGATGTGGCTCGTCAA
58 H G K A Y N A L G E K E K R F Q I F K D
301 CATGGGAAAGCTTATAATGCTTTGGGCGAGAAGGAGAAGCGGTTTCAGATCTTTAAAGAT
78 N L K F I D E H N S V N R S Y K L G L N
361 AATCTTAAATTCATCGATGAGCATAACTCGGTTAATCGGAGTTATAAGCTCGGATTGAAC
98 R F A D L S N E E Y R A M F L G T R M E
421 CGGTTCCGGATCTGAGTAATGAGGAGTACCGGGCGATGTTCTTGGGTACAAGGATGGAA
118 R K N R L G A S M G T E S R Y L Y K E G
481 AGGAAAAATAGATTGGGGGCATCGATGGGACTGAAAGTAGGTATTTGTATAAAGAAGGT
138 D D L P E K V D W R E K G A V V P V K N
541 GATGATTTGCCGAAAAGGTTGATTGGAGAGAAAAAGGGGCTGTTGTTCTGTCAAGAAT
158 Q G Q C G
601 CAAGGACAGTGTGgtaagtttgtttcttagcgatttttccttttctttttgagttttg
661 ttggttttgattgcttgtgaagtgggacctggaagcatggcatgttcttccaaggatttt
721 cctggaaactagcgacaccaattgatttttgatttgtagtgttatctccttagcaggga
163                                                                 S C
781 tatttcttgatttttcgtgaaagaaaataaattgtttgttttatttattgaagGGAGTT
165 W A F S T V A A V E G I N Q I V T G D L
```

---

841 GCTGGGCTTTCTCAACTGTTGCTGCAGTAGAAGGGATTAACCAGATTGTAAGTGGTGATC  
185 I S L S E Q E L V D C D R S Y N Q G C N  
901 TAATCTCTCTATCAGAGCAGGAGTTGGTAGATTGTGATAGATCATATAACCAGGGATGCA  
205 G G L M D Y A F E F I I Q N G G I D T E  
961 ATGGAGGTCTTATGGACTATGCCTTTGAATTTATTATCCAAAATGGTGGTATTGATACTG  
225 Q D Y P Y E A V D N V C D P Y R  
1021 AACAAAGATTACCCATATGAGGCTGTTGATAATGTTTGTGATCCATACAGGgtatgctaaa  
1081 tttattttacttaatcctttgttctgtagttacattggtatattgatcgttctaat  
241 K N A K V V T I D G Y E  
1141 tatttgttcttgcacatcttttagAAAAATGCTAAGGTAGTTACTATTGATGGATATGA  
253 D V P E N D E K S L K K A V A N Q P V S  
1201 AGATGTTCTGAAAATGATGAGAAATCCTTGAAGAAGGCTGTGGCAAATCAGCCAGTTAG  
273 V A I E A G G R A F Q L Y Q S  
1261 TGTTGCCATTGAAGCTGGTGGCAGGGCTTTCCAACCTTACCAATCGgtaattactcttta  
1321 ttgccaaatgaaattatctcatttgcagtttaacaagagcagtgttatattttgtgagta  
1381 ctagttatacagaaactattataattcctattcttttggtttggcataattttgttaact  
1441 caactcaatatatgttatgcatcagaatcatataacaagttgaatatataaagtacaat  
288 G V  
1501 ctttgctggcattgattgttttgtacttgtctttaattttacttctcaatgcagGGTGT  
290 F T G R C G T Q L D H G V A A V G Y G T  
1561 TTTTACTGGTAGATGTGGTACACAGCTTGACCATGGTGTGGCTGCTGTTGGATATGGCAC  
310 E N G V D Y W L V R N S W G P D W G E S  
1621 AGAGAATGGTGTAGATTACTGGTTGGTGGAGAACTCATGGGGTCTGATTGGGGTAAAAG  
330 G Y I K L E R N L A T T T T G K C G I A  
1681 TGGTTATATCAAGTTGGAGCGTAATTTGGCCACCACCACAACCTGGAAAATGTGGAATTGC  
350 V E A S Y P T K K G P N P P N P G P T P  
1741 AGTGGAGGCTTCATATCCAACCAAGAAGGGTCCAAATCCCCCTAATCCTGGCCCAACCCC  
370 P S P V N P P P P K P S T Q C D D Y F S



---

**Supplementary File S9. The gene model for *JcCEP2*.** The coding region is marked with uppercase letters, above which are its deduced amino acids. The transcribed untranslated regions, including 5' UTR, intron and 3' UTR sequences, are marked with lowercase letters. The start and stop codons are marked with bold letters.

```
1 ctttgattgtctgaagtcacgttttctttctgttgcatagccgtaaccttttctgctca
61 atttttggttaaagctctcaaaaagcgtataaccctcatctcttctccatggetatata
121 acaattcaacacatccttgcaatttcattgctaagccaacaagaaaatcaagaattccc
1
M G A R N I
181 gactttgtaacccttttcttgatttatagtaggttagatattATGGGTGCAAGAAATA
7 I L F A V S L V L V F K I A E S L D Y Q
241 TAATCTTGTTTGCCGTTTCATTAGTGCTAGTTTTTAAGATAGCTGAAAGTTTGATTACC
27 E A D L A S E E S L W N L Y E R W R S H
301 AAGAAGCAGACTTAGCGTCGGAAGAGAGTCTTTGGAAGTGTACGAGCGGTGGAGAAGCC
47 H T I S R S L T E K K Q R Y N V F K E N
361 ATCACACAATCTCTCGTAGCCTGACAGAGAAAAAGCAGCGATAACAATGTGTTCAGGAAA
67 L K H I H N V N Q K D K P Y K L R L N K
421 ATTTGAAGCATATTCATAACGTTAACCAGAAGGATAAGCCTTATAAATTGAGATTGAATA
87 F A D M T N H E F L Q H Y G G S K V S H
481 AGTTTGCGGATATGACTAATCATGAGTTCTTGCAACATTATGGAGGCTCTAAGGTTAGCC
107 F R M L H G S R Q K T G F S H H N T D L
541 ACTTCAGGATGCTACATGGGTCTCGTCAGAAAAGTGGGTTTAGCCACCACAACACTGATC
127 P P S V D W R K K G A V T G V K D Q G K
601 TTCCACCTCCGTTGATTGGAGAAAGAAAGGAGCAGTCACTGGTGTAAGGATCAAGGCA
147 C G
661 AATGTGgtgagtttctcaagtcataaatttcagctttcagtatTTTTtagtaataattttg
721 aacttataatcactagatctttaaatgacactcttaactcttggtttataaatatttaa
149
S C W A F S S V A A V E
781 atcaatgatttttatgctatacagGTAGCTGTTGGGCATTTCAAGTGTGGCAGCAGTGG
161 G I N K I K T G E L V S L S E Q E L V D
```

---

841 AGGGTATTAACAAAATCAAAACAGGAGAATTAGTTTCTCTATCAGAGCAAGAGTTGGTTG  
181 C S S A N H G C D G G L M E Q A F K F I  
901 ATTGCAGCTCTGCCAACCATGGCTGTGATGGAGGATTAATGGAACAGGCATTCAAGTTCA  
201 K K I G G I T A E T T Y P Y T A R D G S  
961 TTAAGAAAATTGGTGAATAACCGCAGAGACTACCTATCCTTATACTGCTAGAGATGGAT  
221 C D S N K  
1021 CCTGTGACTCAAACAAGgttaactgagtttaatatattgatctataactcaactttttcagt  
226 M  
1081 gtacgtatatgtttctatgcacaagtgaggattatatacttttcttggtgtttagAT  
227 N A P V V Q I D G Y E M V P E N D E N A  
1141 GAATGCTCCTGTTGTGCAAATTGATGGATACGAAATGGTGCCAGAAAACGACGAGAATGC  
247 L M K A V A N Q P V S I A I D A G G K D  
1201 ATTGATGAAAGCTGTTGCTAACCAACCAGTATCTATTGCAATAGATGCAGGCGGAAAAGA  
267 M Q F Y Y E  
1261 TATGCAATTCTATTATGAGgcaagttttttattcaataggaaactgtacagctgaatca  
1321 aacagaccctatgatatagttttttcattccctgaaaattttgtttctcttgttgttga  
273 G V F T G D C G T E L N H G V A L V G Y  
1381 gGGAGTATTCAGTGGAGATTGCGGGACAGAGCTAAACCATGGGGTAGCACTTGTGGGATA  
293 G T T L D G T K Y W I V K N S W G S D W  
1441 TGGCACAACACTAGATGGCACAAAGTATTGGATAGTGAAGAATTCATGGGGAAGTGATTG  
313 G E N G Y I R M E R G I D A E E G L C G  
1501 GGGAGAGAATGGTTACATAAGAATGGAAAGAGGGATTGATGCAGAAGAGGGACTGTGTGG  
333 I T L E A S Y P I K N S S D N K K S P D  
1561 TATAACTTTGGAGGCTCTTACCCTATCAAGAATAGCTCAGACAACAAGAAATCACCCGA  
353 S R R D E L \*  
1621 TTCTCGCAGAGATGAACTCTAAatttgattatatactatctatatatatatgcctcaat  
1681 aacttaaggacctaaaaggagagtttttaatttaattaccgcttttctcttttagtatta  
1741 attaagttgaagttggatttctttgcatctcttttgttatatatagttcaatgatttga



---

1801 attccaataaaaccaatgctttctctc

---

**Supplementary File S10. The gene model for *JcXBCP3L*.** The coding region is marked with uppercase letters, above which are its deduced amino acids. The transcribed untranslated regions, including 5' UTR, intron and 3' UTR sequences, are marked with lowercase letters. The start and stop codons are marked with bold letters.

```
1  gaggatatggttgcctctgactggttaggccgggagtaagaccatgtttcgaaacttataaac
1      M T D Q N P I G H C L V I K R K M S
61  actataATGACAGATCAAAACCCAATCGGCCACTGCTTAGTGATAAAGAGAAAAATGAGT
19  F Q K L G L A I V F L V L S L V P L T C
121 TTCCAAAAGTTGGGATTAGCAATCGTTTTTCTGGTTTTATCTTTAGTGCCACTAACCTGC
39  F S F S L P S E Y S I V G N D L H E L L
181 TTCTCTTTTAGCTCCCAAGCGAGTACTCTATAGTTGAAAACGACCTTCATGAGCTGCTT
59  S H E R V I E L F Q Q W K L E H K K I Y
241 TCTCACGAACGGGTGATCGAGCTGTTCAACAATGGAAACTGGAGCACAAAAAGATTTAC
79  K H A E E A E K R L E N F R R N L K Y V
301 AAGCACGCAGAAGAGGCAGAAAAGAGGCTCGAAAATTTTCGAAGGAATTTAAAGTATGTG
99  I E K N A K N A E M G T G F K V G L N K
361 ATAGAGAAGAATGCGAAGAATGCAGAGATGGGTACAGGATTTAAAGTTGGATTGAACAAA
119 F A D L S N E E F K Q T Y L S K V K K P
421 TTTGCAGATTTGAGTAATGAGGAGTTTAAGCAAACGTATCTGTGCGAAAGTGAAAAACCT
139 I S K K K N T M M T T G Q R N L Q A C E
481 ATCAGTAAAAAGAAAAATACAATGATGACTACCGGACAGAGAAAATTTGCAGGCTTGTGAG
159 A P S S L D W R K K G V V T P I K N Q G
541 GCGCCTTCTAGCTTGGATTGGAGGAAGAAGGGAGTTGCTACTCCAATAAAGAACCAAGGA
179 N C G
601 AATTGTGgtaattttctataatttctccctcttatatatattacatatgtacatatatgc
661 atacttgatgtatatgtgaaggcataagacaccataaatgatatgacaggttttagataa
721 cttaaaatctaaagtaaaaagtactttgatgctaagagaataaaaaaaaaacgtaaatat
781 attcataggtataggttgaagtatacaacatacttgagttaacatatgatttaacgt
841 tcataaaaaataattgaaagaaaagaaaaaaggcagatgcccttttattattcataaac
```

---

901 tggctttcctgttattattcacttaccagacgtaatcctagttaacattaggataataa  
182 S  
961 tgtgggaaattatcttcattttgggtgacttcaactagattgatatttgtttacagGAAG  
183 C W S F S V T G A I E G I N A I V T G D  
1021 TTGTTGGTCATTCTCTGTAAGTGGCGCCATAGAAGGAATAAACGCCATAGTTACTGGTGA  
203 L I S L S E Q E L V D C D T T N F G C D  
1081 CCTAATTAGCCTTTCAGAACAAGAACTGTAGATTGTGATACCACCAATTTCCGGATGTGA  
223 G G Y M D Y G F E W V I N N G G I D T E  
1141 TGGAGGCTATATGGACTACGGTTTTGAATGGGTTATTAACAACGGTGGGATTGACACAGA  
243 A N Y P Y T G V N G T C N I T K  
1201 AGCGAATTATCCATATACTGGTGTAAATGGGACCTGCAATATCACCAAGgtttctttctt  
1261 atctaaaatcttattttacccatataccaatgcgaacatgatttaaaccttaactctgtt  
259 E E M K I V T V D  
1321 gtgtgtctcattaatgatctttttgtttgatcagGAGGAAATGAAAATTGTTACCGTTGA  
268 G Y E D V A K S D S A L F C A T A Q Q P  
1381 TGGGTACGAGGATGTAGCTAAATCAGACAGTGCCCTGTTCTGTGCTACAGCTCAGCAACC  
288 V S V G M D G S A E D F Q L Y T S  
1441 TGTTTCTGTGGGTATGGATGGTTCTGCAGAAGATTTCAATTGTATAACAAGTgtaagtct  
1501 ttttgttcgtttcatgagtacaattaaaaagataattactatagaagtgtttgataaaat  
305 G I Y D G N C S S N P D D  
1561 ggaaatgatgtgatatgatcagGGGATTTATGATGGTAATTGCTCCAGTAATCCAGACGA  
318 I D H A V L I I G Y G S E G D E D Y W I  
1621 CATTGATCATGCCGTTTTGATCATTGGGTATGGATCTGAAGGTGATGAAGATTATTGGAT  
338 V K N S W G T D W G I D G Y F Y L R R N  
1681 AGTGAAAAATTCGTGGGGTACTGACTGGGGTATCGATGGATACTTTTATTTAAGAAGGAA  
358 T D L T Y G V C A V N A M A S Y P T K Q  
1741 TACTGATTTAACATATGGCGTTTGTGCTGTTAATGCAATGGCTTCTTATCCTACTAAACA  
378 S S A P S P T S P P S P L S P P P P P S

---

1801 ATCCTCTGCTCCATCTCCAACAAGTCCTCCTTCACCACTATCACCTCCTCCACCACCATC  
398 L P P P P P P T P V P P P P P P S P S E  
1861 ACTACCACCACCACCTCCTCCGACACCAGTGCCTCCACCTCCTCCTCCTCACCAAGTGA  
418 C G D F S Y C P S G E T C C C F L E I F  
1921 ATGTGGAGATTTCTTACTGTCCAAGCGGTGAAACATGTTGTTGCTTTCTTGAAATCTT  
438 D I C W A Y S C C P F E N A V C C P D S  
1981 TGATATCTGTTGGGCATATAGTTGCTGTCCTTTTGAGAATGCTGTATGCTGCCCTGATTC  
458 L D C C P S D Y P I C D V V E G L C L Q  
2041 ATTAGATTGCTGCCCTAGTGATTACCCTATTTGTGATGTTGTGGAAGGCCTCTGCCTCCA  
478  
2101 Ggtaagaatcgtcaatttaataactccccatttcacatatataagtcggttagagtaatt  
2161 ttattgtctgtaaataaagtagtttttaaatattgtcaattcaaacagtagcattaat  
478 N P G D Y L G V  
2221 acaccttagttaattgtttattgaaattgtgtaacagAACCCAGGAGATTACTTGGGAGT  
486 A S R K R H M A K H K L P W S K K E Q S  
2281 TGCTTCCAGGAAGCGGCATATGGCTAAGCACAAGCTTCCCTGGAGTAAAAAGAGCAAAG  
506 K R Q T Y Q P L V W K R N P F A A I R \*  
2341 CAAACGACAGACTTACCAACCTCTCGTGTGGAAGAGGAACCCCTTTCGCTGCAATTCGCTG  
2401 Aaaaataatgtgatttttcttattaatttaaagttgtttcattgcaactttttgaatgatc  
2461 ctattacaaaaaaacttatgttttataaatattattaggggaaaatttgcaatgtgtgt  
2521 tccatttgattatggttttttgatgtttgaattaaagattggtttcccttattatatatg  
2581 tcttgcagctttttgcaagccaaaaattcagtattgttgtcaaggccttgtaataaacct  
2641 tactaaatgggttttttaattaaaataaacaatcatttttccatttgaaa

---

**Supplementary File S11. The gene model for *JcTH11*.** The coding region is marked with uppercase letters, above which are its deduced amino acids. The transcribed untranslated regions, including 5' UTR, intron and 3' UTR sequences, are marked with lowercase letters. The start and stop codons are marked with bold letters.

```
1  ttccccagaaaaatggacagcaaagaagacatgaatgaaacaagaagtccaactgaaa
61  taacttgtgcaaaagtatgatctacgtaaataactgcattccgtaagcaaccca
121 tatatcattcctgggatgtactaaaattgtcatttataagctcccattctccatagacat
1      M E S H I N L K K A G L I L I S L
181 cgtcagtagccATGGAGTCGCATATTAATTTAAAGAAAGCTGGCTTGATTCTTATATCTC
18   C I L L I H T M A D L E I H S L P R Y N
241 TCTGCATTCTATTGATACATAACAATGGCAGATTTAGAAATCCATAGTCTGCCAAGATATA
38   P K A M R K R Y D R W L K H H G R K Y H
301 ACCCAAAGCCATGAGAAAGAGGTATGACAGGTGGCTGAAACATCATGGTCGAAAATATC
58   N K D E Y Y L R F G I Y Q S N I Q F I D
361 ATAACAAAGACGAATATTATCTGCGGTTTGAATATATCAATCAAACATTCAGTTCATTG
78   Y I N A Q K L P Y E L R D N K F A D L T
421 ACTACATCAATGCTCAGAAATTACCATACGAACTCAGAGATAACAAGTTTGCAGACTTGA
98   N D E F K S I Y L G F Q A N K H G R K K
481 CTAATGATGAGTTTAAATCTATCTACCTGGGTTTTTCAGGCTAATAAACACGGTAGAAAGA
118  P S H E H G N S S D L P T S V D W I K E
541 AGCCTAGCCATGAGCATGGAACTCCTCAGACTTGCCAACCTCAGTAGATTGGATAAAGG
138  G A V T P V K D Q G Q C G
601 AAGGCGCTGTAACCCCGTTAAAGATCAAGGTCAATGTGgtatgaagctttgttcctt
661 ttctttttcattttttcttcctgagaaatgtgagccaagtgcactttttagaagtgc
721 ttttgttttatgccaattgtcaattaatcattttgttttattctaagaattttggcatg
151                                     S C W A F S A V A A
781 acaagatctaaagtgacagttctatacagGAAGTTGTTGGGCATTCTCTGCAGTGGCAGC
161  V E G I N K I K T G K L V S L S E Q E L
841 TGTTGAAGGCATTAACAAAATCAAGACAGGAAAATTAGTATCTCTGTCAGAACAAGAGCT
```

---

181 V D C D T H N D S Q G C N G G F M E T A  
901 TGTAGACTGTGATACTCACAATGATAGCCAGGGATGTAATGGTGGATTTCATGGAAACAGC  
201 F T Y I Q K Q G L S I E D D Y P Y E G K  
961 GTTTACATACATTCAAAAGCAGGGGCTCTCCATTGAAGATGATTATCCCTATGAAGGAAA  
221 D G N C H K N K N K N Q T V T I S G Y E  
1021 AGATGGCAACTGCCACAAAAACAAAAATAAAAATCAGACAGTACTATTAGTGGTTATGA  
241 A V P A N D E K S L Q T A V A K Q P V S  
1081 AGCAGTACCTGCCAATGATGAGAAAAGCCTACAACTGCAGTTGCCAAGCAACCTGTATC  
261 V A I D A G G F S F Q F Y S K G I F S G  
1141 TGTTGCAATTGATGCCGGTGGTTTTTCATTTCAATTCTACTCAAAAGGAATCTTCAGTGG  
281 F C G T Q L N H G V T A V G Y G E T D G  
1201 CTTCTGTGGAACACAACCTCAACCATGGAGTCACAGCAGTCGGCTACGGAGAACTGATGG  
301 K K Y W L V K N S W G T E W G D S G Y I  
1261 TAAAAGTACTGGCTCGTTAAAAATTCATGGGGTACAGAGTGGGGTGATTCTGGCTATAT  
321 K L R R G S K G K K G I C G I A M E P S  
1321 AAAACTGAGGCGTGGTTCCAAGGGCAAGAAAGGTATCTGTGGCATTGCCATGGAGCCTAG  
341 Y P V K E Q E \*  
1381 CTACCCTGTCAAGGAACAGGAATAAgaatcattttatatgtgcttggctgatcctggctt  
1441 tagggtgacttgacaatctcttaacaagatgtcttccatattagtaattacatacaaatc  
1501 caagtaaaagatattgctcatggaaattaatttaacaatagttaagctttgcaggaagta  
1561 tggtagggaaaatgcatgccataagcataagaagatgggtaattccttcgatcaaaatg  
1621 gatattacatcattgattggagatccccaattcttgatataaaatgcttaacataacttt  
1681 catctatctcatttgtcatttggcaaagcccgaaaaagaaccgcataccaatcacaagt  
1741 ctttcgagcaactaaaaggtgtaataatctttactttgttctggagtgaaaatgagactta  
1801 aagtctgtaggtatatttaaggtttgaatgtatcagaatatggatgagcctcaagagcca  
1861 tcattgcaacaaaaaatttgcacatgatttagcatcaattgactgattgaggttaaggctt  
1921 tgcttactttgtttatataattgaaccaaatgtgtaagtacaacattaatcagtttagca  
1981 gaaatcagaattgtaaactaac

---

**Supplementary File S12. The gene model for *JcSAG12H1*.** The coding region is marked with uppercase letters, above which are its deduced amino acids. The transcribed untranslated regions, including 5' UTR, intron and 3' UTR sequences, are marked with lowercase letters. The start and stop codons are marked with bold letters.

```
1                               M T K K Q S
1 caaagattccttctgtatagttatagatactctcttgatactATGACTAAAAACAAAGC
7 K S I F L V F V L N I L T I W A T H T V
61 AAATCCATATTTCTGGTATTTGTGTTGAACATATTAACCATATGGGCTACACATACGGTT
27 C R P L N E E Y M L K R H E E W R A Q H
121 TGTCGTCCTCTTAACGAAGAATACATGTTAAAGAGGCATGAAGAATGGAGAGCCCAACAT
47 G R V Y K D T A E K Q K K Y L V F K D N
181 GGACGTGTCTACAAAGACACAGCAGAGAAAACAGAAAAAATACCTGGTTTTTAAGGACAAC
67 L E R I E S F N N G V D R G Y K L G L N
241 CTTGAACGTATTGAATCCTTTAACAATGGTGTGGACCGTGATACAAGCTAGGACTCAAC
87 K F A D L T D E E F Q A M H L G Y K S P
301 AAATTTGCAGACTTAACAGATGAGGAATTTTCAGGCCATGCACCTTGTTACAAGAGCCCA
107 P S K L M S T S K S R S F R Y R N V T S
361 CCCTCCAAATTAATGTCCACTTCAAAGTCCAGATCCTTTAGGTACAGAAATGTAACTTCT
127 V P T T I D W R K A G A V T P V K D Q G
421 GTGCCAACTACTATAGATTGGAGAAAGCCGGTCTGTGACCCCTGTCAAAGATCAAGGC
147 S C G
481 TCCTGCGgtgagtgctgatataatcctaataatgtaaggcagaagtagacctaggatttag
541 aaccttaacttgcatactatgagacagactcaaccactgtcctattgctaaataaatac
601 acatgaaattgaacaatgattttgatcttaaaaatcatgctattgatgcataacagaaaa
661 gagcaatccccgcaccacaaatgaaaattcgtttctaataaatcattttttaatgtttaa
150           S C W A F S A V A A M E G I T K L
721 tgcatagGAAGTTGCTGGCATTCTCAGCAGTGGCAGCAATGGAAGGGATCACAAAACTC
167 K T G N L I S L S E Q E L V D C D V A G
781 AAAACTGGCAATTTAATATCTTTATCAGAGCAAGAGCTCGTAGATTGCGACGTAGCAGGT
187 E D Y G C D G G F M D T A F Q Y I L K N
841 GAGGATTATGGTTGTGACGGAGGTTTCATGGACACTGCTTTCCAATATATCCTAAAAAAT
207 G G L T S E A N Y P Y Q G E D G I C S K
```

---

901 GGAGGTCTCACGAGTGAGGCTAATTACCCCTACCAAGGAGAAGATGGCATCTGCAGCAAG  
227 K K T A T S M A K I T G Y E D V P S N S  
961 AAGAAGACAGCAACTTCTATGGCTAAAATAACTGGATATGAAGATGTGCCATCTAACAGT  
247 E K A L L Q A V A N Q P V S V A I D A S  
1021 GAAAAGGCTCTCTTGCAAGCTGTGGCAAACCAACCAGTTTCTGTTGCTATTGATGCTAGT  
267 G Y D F R F Y S S G V F K G D C P T D L  
1081 GGGTATGACTTCAGATTTTACTCTTCTGGTGTTTTTAAAGGGGACTGTCCTACCGATCTC  
287 N H A V T V I G Y G S S S D G T K Y W L  
1141 AACCATGCTGTTACTGTAATTGGGTATGGTAGTAGCAGTGATGGTACTAAGTATTGGTTG  
307 L K N S W G T G W G E N G Y M R M Q R E  
1201 CTAAAGAATTCATGGGGCACCGTTGGGGTGAGAATGGGTATATGAGGATGCAAAGGGAA  
327 I S A N E G L C G I A M K A S Y P T A \*  
1261 ATTAGTGCAAACGAAGGCCTCTGTGGCATTGCCATGAAAGCTTCGTATCCAACCTGCT**TGA**  
1321 aattgaacaaggagaagcataatggcaataaatcctatttgatgtgtagtatcagaaa  
1381 tttataggctgtaaaatgttctgctatctgtgctcattctatctttcatgcagttgtata  
1441 atttcagcaatatgtgtttactatccatgcataaaggttcattttattagctatcaagt  
1501 accaac



---

**Supplementary File S13. The gene model for *JcSAG12H2*.** The coding region is marked with uppercase letters, above which are its deduced amino acids. The transcribed untranslated regions, including 5' UTR, intron and 3' UTR sequences, are marked with lowercase letters. The start and stop codons are marked with bold letters.

```
1                               M T K K Q S
1 caaagattccttctttatagttatagatactctcttgatactATGACTAAAAACAAAGC
7 K S I F L V F V L N I L T I W A T H T V
61 AAATCCATATTTCTGGTATTTGTGTTGAACATATTAACCATATGGGCTACACATACGGTT
27 C R P L N E E Y M L K R H E E W R A Q H
121 TGTCGTCCTCTTAACGAAGAATACATGTTAAAGAGGCATGAAGAATGGAGAGCCCAACAT
47 G R V Y K D T A E K Q K K Y L V F K D N
181 GGACGTGTCTACAAAGACACAGCAGAGAAAACAGAAAAAATACCTGGTTTTTAAGGACAAC
67 L E R I E S F N N G V D R G Y K L G L N
241 CTTGAACGTATTGAATCCTTTAACAATGGTGTGGACCGTGATACAAGCTAGGACTCAAC
87 K F A D L T D E E F R A M H L G Y K S L
301 AAATTTGCAGACTTAACAGATGAGGAATTTTCGGGCTATGCACCTTGTTACAAGAGCCTA
107 P S K L M A T S K S R S F R Y R N V T S
361 CCCTCCAAATTAATGGCCACTTCAAAGTCCAGATCCTTTAGGTACAGAAATGTAACTTCC
127 V P T T I D W R K A G A V T L V K D Q G
421 GTGCCAACTACTATAGATTGGAGAAAGGCTGGTGTGTGACCCTTGTCAAAGATCAAGGC
147 S C G
481 TCCTGCGgtaagtgctgatataatcctaataatataaggcagaagtagacctaggatttag
541 aaccttaacttgcatactatgagacagactcaaccattgtcctattgctaaataaatac
601 acataaaaacaatgattttgatcttaaaaatcatgctattgatgcataacagaaaagagc
661 aatccccgtaccagaaatgaaaattcatttctaataaatcattttttaatgtttaatgca
150   C C W A F S A V A A M E G I T K L K T
721 tagGATGTTGCTGGGCATTCTCAGCAGTGGCAGCAATGGAAGGAATCACAAAACCTAAAA
169   G K L I S L S E Q E L V D C D I A G E D
781 CTGGCAAGTTAATATCTTTATCAGAGCAAGAGCTCGTAGATTGTGACATAGCAGGTGAGG
189   Y G C D G G F I D T A F Q Y I L K N G G
841 ATTATGGTTGTGACGGAGGTTTCATAGACACTGCTTTCCAATATATCCTAAAAAATGGAG
209   L T S E A N Y P Y Q G E D G I C S K K K
```

---

901 GTCTCACGAGTGAGGCTAATTACCCCTACCAAGGAGAAGATGGCATCTGCAGCAAGAAGA  
229 T A T S T A K I T G Y E D V P S N S E K  
961 AGACAGCAACTTCTACGGCTAAGATAACTGGATATGAAGATGTGCCATCTAACAGTGAAA  
249 A L L Q A V A N Q P V S V A I D A S G Y  
1021 AGGCTCTCTTGCAAGCTGTGGCAAACCAACCAGTTTCTGTTGCTATTGATGCTAGTGGGT  
269 D F R F Y S S G V F Q G D C T T Y L N H  
1081 ATGACTTCAGATTTTACTCTTCTGGTGTCTTTCAAGGGGACTGTACTACCTATCTAAACC  
289 A V T V I G Y G S S S Y G T K Y W L L K  
1141 ATGCTGTTACTGTAATTGGGTATGGTAGTAGCAGTTATGGTACTAAGTATTGGTTGCTAA  
309 N S W G T G W G E N G Y M R M Q R E I S  
1201 AGAATTCATGGGGCACCGTTGGGGTGAGAATGGGTATATGAGGATGCAAAGGAAATTA  
329 A N E G L C G I A M K A S Y P T A \*  
1261 GTGCAAATGAAGCCTCTGTGGCATTGCCATGAAAGCTTCGTATCCAAGCTGCT**TGA**aatt  
1321 gaacaggagaagcataatggcaataaatcctatttgatgtgtagtatcaggaaatttat  
1381 aggctgcaaatgttctgctatctgtgctcattctatctttcatgcagttgtataatttc  
1441 agcaatatgtgtttaatatccatgtataaaggttcatttatttttagctatcaagtaccaa  
1501 t

---

**Supplementary File S14. The gene model for *JcSAG12H7*.** The coding region is marked with uppercase letters, above which are its deduced amino acids. The intron sequences are marked with lowercase letters. The start and stop codons are marked with bold letters.

1 M A V V V L L E N K L I F V A V L V M G  
1 **ATGGCTGTAGTAGTACTACTT**GAAAACAAACTAATCTTTGTTGCAGTGT**TAGT**GATGGGG  
21 L C A C Q G W S R S L Y E A S L E E R H  
61 TTGTGTGCTTGCCAAGGCTGGTCACGTTCCCTCTATGAAGCTTCGTTGGAGGAGAGGCAT  
41 E I W M A Q H E R V Y K D A T E K E M R  
121 GAAATTTGGATGGCCCAACATGAACGTGTTTATAAAGACGCGACAGAAAAGGAGATGCGC  
61 F Q I F R E N V K F I E S F N K A G N K  
181 TTTCAGATATTCAGGGAGAATGTGAAATTCATTGAATCTTTCAACAAGGCTGGGAATAAG  
81 S Y K L G I N A F T D L T N K E F R A S  
241 TCTTATAAGCTAGGGATTAATGCATTACAGACCTACTAATAAGGAATTCGTGCATCG  
101 R N G Y K R S S Y S S S S G T N S F K Y  
301 CGAAATGGATACAAGAGGTCTTCTTATTCAAGCTCATCAGGAACAACTCATTCAAATAT  
121 E N V T T I P S S L D W R S K G V V T P  
361 GAAATGTCACTACAATTCCATCTAGCTTGGATTGGAGAAGCAAAGGAGTCGTTACACCC  
141 I K D Q G Q C G  
421 ATCAAAGACCAAGGTCAATGTGgtaagtaacttggacttcatgtaaacaagtcagggttt  
481 caaatcctgatagtccatccctttaagaattgtgataaaagaaaaaatagaaaagga  
149 C C W  
541 aaaaagaaagaaacctcttaacattatatgaattgcatgcaaaaatgcagGATGTTGTTG  
152 A F S A V A A M E G I T K L S T E K L I  
601 GGCATTCTCTGCGGTGGCAGCTATGGAAGGGATCACAAACTCTCAACTGAGAAATTGAT  
172 S L S E Q E L I D C D T S G I D Q G C E  
661 CTCCCTTTCTGAGCAAGAATTGATTGACTGTGATACAAGTGAATAGACCAAGGCTGTGA  
192 G G L M D D A F E F I I Q N N G L T T E  
721 GGGTGGTCTTATGGATGATGCCTTTGAATTCATTATTCAAATAATGGCCTTACGACTGA  
212 A N Y P Y Q A E D G T C N T E K A A N H  
781 AGCAAATTATCCTTACCAGGCAGAGGATGGAAGTTCGCAACACCGAGAAAGCAGCAAATCA  
232 A A T I T S Y E D V P E N N E E A L R M  
841 TGCTGCCACAATACAAGTTATGAAGATGTGCCAGAAAACAATGAGGAGGCCTTACGCAT

---

252 A V A N Q P V S V A I D A G E S A F Q H  
901 GGCAGTGGCAAACCAACCAGTTTCTGTTGCCATTGATGCTGGTGAATCTGCCTTCCAACA  
272 Y S S G I F T G D C G T E L D H G V T V  
961 CTA~~CT~~CGAGTGGAAATATTTACTGGAGATTGTGGA~~ACT~~GAATTAGACCACGGTGTCACTGT  
292 V G Y G T S D D G T K Y W L V K N S W G  
1021 AGTCGGTTATGGGACAAGTGATGATGGGACTAAGTATTGGTTAGTAAAGA~~ACT~~CATGGGG  
312 T S W G E D G Y I R M Q R D I D A K E G  
1081 AAC~~CAG~~CTGGGGTGAGGATGGATACATTAGAATGCAAAGAGACATTGATGCTAAAGAAGG  
332 L C G I A M Q P S Y P T A \*  
1141 CCTATGTGGAATTGCCATGCAGCCTTCCTATCCA~~ACT~~GCATAA

**Supplementary Fig. S1. Detailed information of 15 motifs identified in this study.**

|           | Logo | E-value   | Sites | Width |
|-----------|------|-----------|-------|-------|
| Motif 1.  |      | 1.3e-1107 | 49    | 30    |
| Motif 2.  |      | 1.5e-881  | 36    | 37    |
| Motif 3.  |      | 1.6e-875  | 44    | 31    |
| Motif 4.  |      | 1.8e-638  | 44    | 21    |
| Motif 5.  |      | 1.0e-565  | 49    | 21    |
| Motif 6.  |      | 1.2e-597  | 47    | 29    |
| Motif 7.  |      | 3.4e-445  | 47    | 21    |
| Motif 8.  |      | 1.7e-342  | 48    | 15    |
| Motif 9.  |      | 6.1e-390  | 28    | 29    |
| Motif 10. |      | 2.8e-273  | 39    | 21    |
| Motif 11. |      | 7.3e-234  | 48    | 11    |
| Motif 12. |      | 5.5e-194  | 8     | 50    |
| Motif 13. |      | 9.9e-141  | 26    | 15    |
| Motif 14. |      | 2.6e-110  | 5     | 50    |
| Motif 15. |      | 3.6e-062  | 17    | 11    |

**Supplementary Fig. S2. Matched positions of 25 RcPLCP genes on physic nut chromosomes.** The positions were based on the synteny analysis and only 8 matched chromosomes were shown. RcPLCP genes were shown behind that of physic nut.

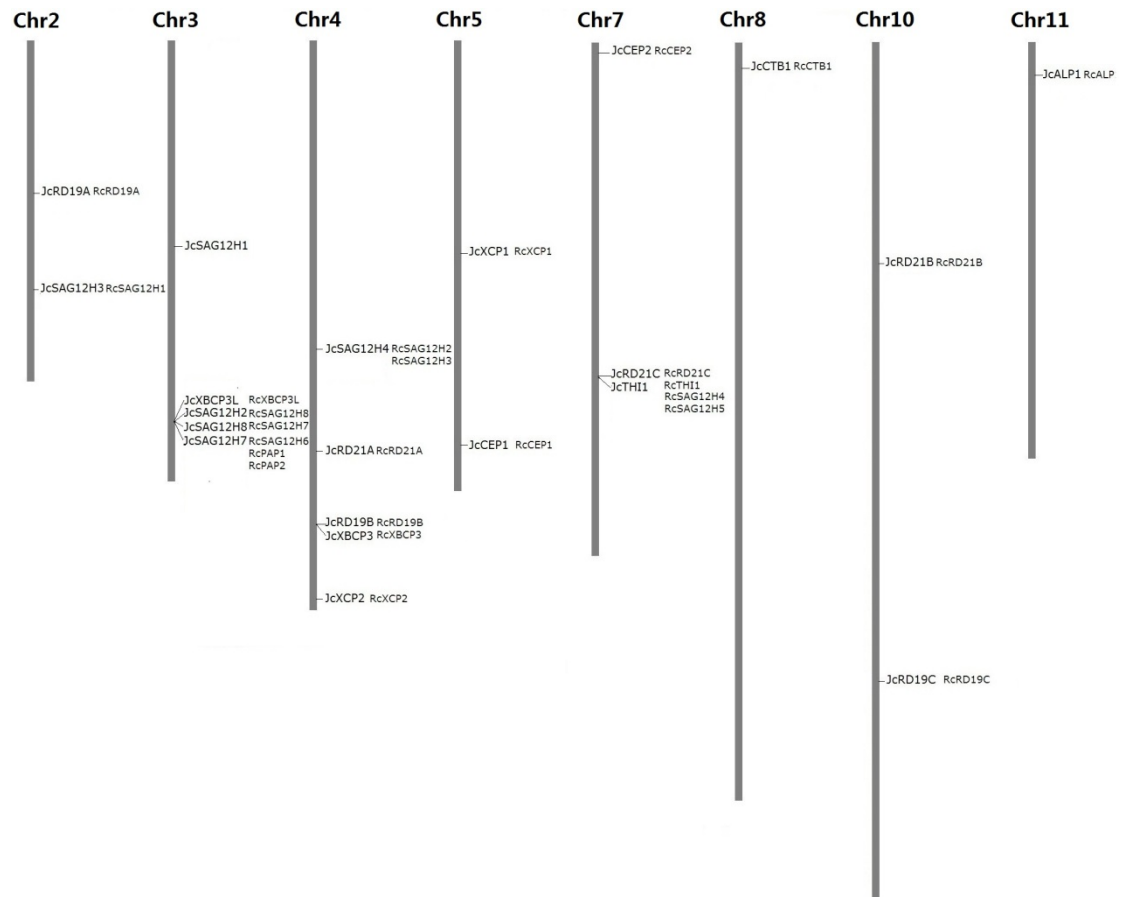

**Supplementary Table S1. Detailed information of 31 PLCP genes in *Arabidopsis*.**

| Subfamily     | Gene name      | Other names      | TAIR ID   | Chr       | Nucleotide length (bp,<br>from start to stop codons) |      | Intron NO. | AS <sup>1</sup> | AA   | MW<br>(kDa) | p I   | GRAVY  | iPSORT <sup>2</sup> | Duplicate | Mode <sup>3</sup>                           |
|---------------|----------------|------------------|-----------|-----------|------------------------------------------------------|------|------------|-----------------|------|-------------|-------|--------|---------------------|-----------|---------------------------------------------|
|               |                |                  |           |           | CDS                                                  | Gene |            |                 |      |             |       |        |                     |           |                                             |
| RD21          | <i>AtRD21A</i> | RD21             | AT1G47128 | Chr1      | 1389                                                 | 2471 | 4          | -               | 462  | 50.97       | 5.26  | -0.446 | S                   | AT1G47128 | Beta                                        |
|               | <i>AtRD21B</i> |                  | AT5G43060 | Chr5      | 1392                                                 | 2334 | 4          | -               | 463  | 51.20       | 5.86  | -0.457 | S                   |           |                                             |
|               | <i>AtRD21C</i> | CP1              | AT3G19390 | Chr3      | 1359                                                 | 1745 | 4          | -               | 452  | 49.31       | 5.60  | -0.368 | S                   | AT4G11310 | Proximal<br>Tandem<br>Transposed            |
|               | <i>AtRDL1</i>  |                  | AT4G36880 | Chr4      | 1131                                                 | 1489 | 3          | -               | 376  | 41.64       | 7.54  | -0.505 | S                   |           |                                             |
|               | <i>AtRDL2</i>  |                  | AT3G19400 | Chr3      | 1089                                                 | 1369 | 3          | Yes             | 362  | 40.29       | 4.77  | -0.322 | S                   |           |                                             |
|               | <i>AtRDL3</i>  |                  | AT3G43960 | Chr3      | 1131                                                 | 1507 | 3          | -               | 376  | 41.54       | 5.08  | -0.235 | S                   |           |                                             |
|               | <i>AtRDL4</i>  |                  | AT4G11310 | Chr4      | 1095                                                 | 1725 | 3          | -               | 364  | 39.92       | 5.69  | -0.326 | S                   |           |                                             |
|               | <i>AtRDL5</i>  |                  | CP2       | AT4G11320 | Chr4                                                 | 1116 | 1492       | 3               | -    | 371         | 40.71 | 5.58   | -0.349              |           |                                             |
| <i>AtRDL6</i> | AT4G23520      | Chr4             | 1071      | 1763      | 3                                                    | -    | 356        | 39.60           | 5.65 | -0.378      | S     |        |                     |           |                                             |
| CEP           | <i>AtCEP1</i>  |                  | AT5G50260 | Chr5      | 1086                                                 | 1258 | 2          | -               | 361  | 40.71       | 7.15  | -0.613 | S                   | AT5G50260 | Beta<br>Tandem                              |
|               | <i>AtCEP2</i>  |                  | AT3G48340 | Chr3      | 1086                                                 | 1336 | 2          | -               | 361  | 40.37       | 5.99  | -0.617 | S                   |           |                                             |
|               | <i>AtCEP3</i>  |                  | AT3G48350 | Chr3      | 1095                                                 | 1619 | 2          | -               | 364  | 40.97       | 5.87  | -0.576 | M                   |           |                                             |
| XCP           | <i>AtXCP1</i>  |                  | AT4G35350 | Chr4      | 1068                                                 | 1347 | 3          | Yes             | 355  | 39.62       | 5.60  | -0.449 | S                   | AT1G20850 | Gamma                                       |
|               | <i>AtXCP2</i>  |                  | AT1G20850 | Chr1      | 1071                                                 | 1330 | 3          | -               | 356  | 39.71       | 5.16  | -0.478 | S                   |           |                                             |
| XBCP3         | <i>AtXBCP3</i> |                  | AT1G09850 | Chr1      | 1314                                                 | 2028 | 4          | -               | 437  | 48.07       | 6.02  | -0.309 | S                   |           |                                             |
| THI           | <i>AtTHI1</i>  |                  | AT1G06260 | Chr1      | 1032                                                 | 1137 | 1          | -               | 343  | 37.77       | 7.51  | -0.225 | S                   |           |                                             |
| SAG12         | <i>AtSAG12</i> |                  | AT5G45890 | Chr5      | 1041                                                 | 1460 | 2          | -               | 346  | 38.23       | 7.98  | -0.321 | S                   | AT1G29080 | Tandem<br>Alpha<br>Transposed<br>Transposed |
|               | <i>AtPAP1</i>  |                  | AT2G34080 | Chr2      | 1038                                                 | 1347 | 1          | -               | 345  | 38.27       | 6.90  | -0.350 | S                   |           |                                             |
|               | <i>AtPAP2</i>  |                  | AT1G29090 | Chr1      | 1068                                                 | 1283 | 1          | -               | 355  | 39.94       | 6.12  | -0.363 | S                   |           |                                             |
|               | <i>AtPAP3</i>  |                  | AT1G29080 | Chr1      | 1041                                                 | 1181 | 1          | -               | 346  | 38.79       | 5.74  | -0.295 | S                   |           |                                             |
|               | <i>AtPAP4</i>  |                  | AT2G27420 | Chr2      | 1047                                                 | 1209 | 1          | -               | 348  | 38.74       | 5.32  | -0.351 | C                   |           |                                             |
|               | <i>AtPAP5</i>  |                  | AT3G49340 | Chr3      | 1026                                                 | 1231 | 1          | -               | 341  | 37.69       | 4.56  | -0.307 | C                   |           |                                             |
| RD19          | <i>AtRD19A</i> | RD19             | AT4G39090 | Chr4      | 1107                                                 | 1501 | 2          | -               | 368  | 40.42       | 6.75  | -0.306 | S                   | AT4G39090 | Alpha<br>Gamma                              |
|               | <i>AtRD19B</i> |                  | AT2G21430 | Chr2      | 1086                                                 | 1338 | 2          | -               | 361  | 39.82       | 7.08  | -0.252 | S                   |           |                                             |
|               | <i>AtRD19C</i> |                  | AT4G16190 | Chr4      | 1122                                                 | 1366 | 3          | -               | 373  | 41.26       | 6.50  | -0.252 | S                   |           |                                             |
|               | <i>AtRD19D</i> |                  | AT3G54940 | Chr3      | 1104                                                 | 1726 | 3          | -               | 367  | 40.13       | 6.79  | -0.198 | S                   |           |                                             |
| ALP           | <i>AtALP</i>   | AALP, ALEU, SAG2 | AT5G60360 | Chr5      | 1077                                                 | 2109 | 7          | Yes             | 358  | 38.96       | 6.26  | -0.186 | S                   | AT5G60360 | Alpha                                       |
|               | <i>AtALP2</i>  |                  | AT3G45310 | Chr3      | 1077                                                 | 1770 | 7          | Yes             | 358  | 39.54       | 6.22  | -0.271 | S                   |           |                                             |
| CTB           | <i>AtCTB2</i>  | CATHB2           | AT1G02305 | Chr1      | 1089                                                 | 2059 | 10         | -               | 362  | 40.03       | 6.45  | -0.217 | S                   | AT1G02305 | Tandem<br>Alpha                             |
|               | <i>AtCTB1</i>  |                  | CATHB1    | AT1G02300 | Chr1                                                 | 1140 | 2089       | 9               | -    | 379         | 42.26 | 6.74   | -0.058              |           |                                             |
|               | <i>AtCTB3</i>  | CATHB3           | AT4G01610 | Chr4      | 1080                                                 | 2081 | 10         | Yes             | 359  | 39.42       | 5.79  | -0.235 | S                   |           |                                             |

<sup>1</sup> “Yes” represents genes containing alternative splicing isoforms; <sup>2</sup> “S, M and C” represent signal peptide, mitochondrial targeting peptide or chloroplast transit peptide, respectively, which was predicted by iPSORT; <sup>3</sup> duplicated modes were determined based on the study of Wang et al. (2013).

## Supplementary Table S2. List of orthologous groups of the PCLP gene family based on the analysis of representative plant species.

| Subfamily | OG | <i>R. communis</i> | <i>I. cretacea</i> | <i>A. thaliana</i> | <i>M. esculenta</i> | <i>P. trichocarpa</i> | <i>C. papaya</i>          | <i>T. cacao</i>           | <i>V. vinifera</i> | <i>A. lyrata</i> | <i>B. oleracea</i> | <i>R. rapa</i> | <i>A. coarctata</i>          | <i>G. sativa</i>                      | <i>A. trichopoda</i> | <i>S. moellendorffii</i> | <i>C. reinhardtii</i> |               |
|-----------|----|--------------------|--------------------|--------------------|---------------------|-----------------------|---------------------------|---------------------------|--------------------|------------------|--------------------|----------------|------------------------------|---------------------------------------|----------------------|--------------------------|-----------------------|---------------|
| RD21      | I  | <i>R-RD21A</i>     | <i>J-RD21A</i>     | <i>AR21A</i>       | Manes.18G041100     | Posit014G041100       | evm.TU.supercontig_21.158 | Thecc1HE003775            | GSVVG0100940001    | ALIG5250         | Bo037029           | Brara.F00502   | -                            | LOC_Os09g57440                        | -                    | -                        | 270344                | Cce09.g407700 |
|           |    | <i>R-RD21B</i>     | <i>J-RD21B</i>     | <i>AR21B</i>       | -                   | Manes.10G077200       | Posit00G020100            | evm.TU.supercontig_300.16 | Thecc1HE007113     | GSVVG01003179001 | ALIG3640           | Bo032703       | Brara.A00157                 | -                                     | -                    | -                        | -                     | -             |
|           |    | <i>R-RD21C</i>     | <i>J-RD21C</i>     | <i>AR21C</i>       | -                   | Manes.13G119500       | Posit00G041000            | evm.TU.supercontig_55.102 | Thecc1HE000063     | GSVVG0102063001  | ALIG3640           | Bo032703       | Brara.H01714                 | -                                     | -                    | -                        | -                     | -             |
|           |    | -                  | -                  | -                  | -                   | -                     | -                         | -                         | -                  | -                | ALIG32800          | Bo018095       | Brara.H02264                 | -                                     | -                    | -                        | -                     | -             |
|           |    | -                  | -                  | -                  | -                   | -                     | -                         | -                         | -                  | -                | ALIG32810          | Bo013106       | Brara.H02264                 | -                                     | -                    | -                        | -                     | -             |
| IV        | -  | -                  | -                  | <i>AR21C</i>       | -                   | -                     | -                         | -                         | -                  | ALIG32810        | Bo013106           | Brara.H02264   | -                            | -                                     | -                    | -                        | -                     |               |
|           |    | -                  | -                  | -                  | -                   | -                     | -                         | -                         | -                  | ALIG32810        | Bo013106           | Brara.H02264   | -                            | -                                     | -                    | -                        | -                     |               |
|           |    | -                  | -                  | -                  | -                   | -                     | -                         | -                         | -                  | ALIG32810        | Bo013106           | Brara.H02264   | -                            | -                                     | -                    | -                        | -                     |               |
|           |    | -                  | -                  | -                  | -                   | -                     | -                         | -                         | -                  | ALIG32810        | Bo013106           | Brara.H02264   | -                            | -                                     | -                    | -                        | -                     |               |
|           |    | -                  | -                  | -                  | -                   | -                     | -                         | -                         | -                  | ALIG32810        | Bo013106           | Brara.H02264   | -                            | -                                     | -                    | -                        | -                     |               |
| V         | -  | -                  | -                  | <i>AR21D</i>       | -                   | -                     | -                         | -                         | -                  | ALIG32810        | Bo013106           | Brara.H02264   | -                            | -                                     | -                    | -                        | -                     |               |
|           |    | -                  | -                  | -                  | -                   | -                     | -                         | -                         | -                  | ALIG32810        | Bo013106           | Brara.H02264   | -                            | -                                     | -                    | -                        | -                     |               |
|           |    | -                  | -                  | -                  | -                   | -                     | -                         | -                         | -                  | ALIG32810        | Bo013106           | Brara.H02264   | -                            | -                                     | -                    | -                        | -                     |               |
|           |    | -                  | -                  | -                  | -                   | -                     | -                         | -                         | -                  | ALIG32810        | Bo013106           | Brara.H02264   | -                            | -                                     | -                    | -                        | -                     |               |
|           |    | -                  | -                  | -                  | -                   | -                     | -                         | -                         | -                  | ALIG32810        | Bo013106           | Brara.H02264   | -                            | -                                     | -                    | -                        | -                     |               |
| CEP       | I  | <i>R-CEP1</i>      | <i>J-CEP1</i>      | <i>ACEP1</i>       | Manes.06G13000      | Posit01C090000        | evm.TU.supercontig_4.28   | Thecc1HE001457            | GSVVG01007583001   | ALIG24300        | Bo015079           | Brara.C02533   | -                            | -                                     | -                    | -                        | -                     |               |
|           |    | <i>R-CEP2</i>      | <i>J-CEP2</i>      | <i>ACEP2</i>       | Manes.14G087000     | Posit01S0487400       | evm.TU.supercontig_33.75  | Thecc1HE001054            | GSVVG01000582001   | ALIG24300        | Bo015079           | Brara.C02533   | -                            | -                                     | -                    | -                        | -                     |               |
| XCP       | I  | <i>R-XCP1</i>      | <i>J-XCP1</i>      | <i>AIXCP1</i>      | Manes.10G097200     | Posit00G020100        | evm.TU.supercontig_232.4  | Thecc1HE003454            | GSVVG0102383001    | ALIG3810         | Bo020880           | Brara.A00297   | AqcoeSG11800 LOC_Os01g73980  | evm_27.TU.AmTr.v1.0_scaffold00022.170 | -                    | -                        | -                     |               |
|           |    | <i>R-XCP2</i>      | <i>J-XCP2</i>      | <i>AIXCP2</i>      | Manes.15G113300     | Posit00G020100        | evm.TU.supercontig_286.15 | Thecc1HE003454            | GSVVG0101342001    | ALIG3810         | Bo020880           | Brara.H02309   | AqcoeSG16420 LOC_Os01g01810  | evm_27.TU.AmTr.v1.0_scaffold00022.173 | -                    | -                        | -                     |               |
| XBCP3     | I  | <i>R-XBCP3L</i>    | <i>J-XBCP3L</i>    | <i>AIXBCP3L</i>    | Manes.18G019400     | Posit00G022000        | evm.TU.supercontig_698.4  | Thecc1HE003454            | GSVVG0100979001    | ALIG20490        | Bo036791           | Brara.F00644   | AqcoeSG18200 LOC_Os01g4220   | evm_27.TU.AmTr.v1.0_scaffold00002.349 | -                    | -                        | -                     |               |
|           |    | <i>R-XBCP3L</i>    | <i>J-XBCP3L</i>    | <i>AIXBCP3L</i>    | Manes.16G080500     | Posit01G066800        | evm.TU.supercontig_7.76   | Thecc1HE002966            | GSVVG0102122001    | ALIG20490        | Bo036791           | Brara.F00644   | AqcoeSG18200 LOC_Os01g4220   | evm_27.TU.AmTr.v1.0_scaffold00002.349 | -                    | -                        | -                     |               |
| TH        | I  | <i>R-TH1</i>       | <i>J-TH1</i>       | <i>AITH1</i>       | Manes.13G139700     | Posit01G066900        | evm.TU.supercontig_209.7  | Thecc1HE003574            | GSVVG01020657001   | ALIG16260        | Bo023341           | Brara.H02966   | AqcoeG24200                  | -                                     | -                    | -                        | -                     |               |
|           |    | <i>R-SAG12</i>     | <i>J-SAG12</i>     | <i>AISAG12</i>     | Manes.16G038400     | Posit00G0485900       | -                         | -                         | -                  | ALIG12660        | Bo006318           | Brara.B02856   | AqcoeG32500 LOC_Os01g12660   | evm_27.TU.AmTr.v1.0_scaffold00061.270 | -                    | -                        | -                     |               |
| SAG12     | Ia | <i>R-SAG12H1</i>   | <i>J-SAG12H1</i>   | <i>AISAG12H1</i>   | Manes.16G038400     | Posit00G0485900       | -                         | -                         | -                  | ALIG12660        | Bo006318           | Brara.B02856   | AqcoeG32500 LOC_Os01g12660   | evm_27.TU.AmTr.v1.0_scaffold00061.271 | -                    | -                        | -                     |               |
|           |    | <i>R-SAG12H2</i>   | <i>J-SAG12H2</i>   | <i>AISAG12H2</i>   | Manes.16G038400     | Posit00G0485900       | -                         | -                         | -                  | ALIG12660        | Bo006318           | Brara.B02856   | AqcoeG32500 LOC_Os01g12660   | evm_27.TU.AmTr.v1.0_scaffold00061.272 | -                    | -                        | -                     |               |
|           |    | <i>R-SAG12H3</i>   | <i>J-SAG12H3</i>   | <i>AISAG12H3</i>   | Manes.16G038400     | Posit00G0485900       | -                         | -                         | -                  | ALIG12660        | Bo006318           | Brara.B02856   | AqcoeG32500 LOC_Os01g12660   | evm_27.TU.AmTr.v1.0_scaffold00061.273 | -                    | -                        | -                     |               |
|           |    | <i>R-SAG12H4</i>   | <i>J-SAG12H4</i>   | <i>AISAG12H4</i>   | Manes.16G038400     | Posit00G0485900       | -                         | -                         | -                  | ALIG12660        | Bo006318           | Brara.B02856   | AqcoeG32500 LOC_Os01g12660   | evm_27.TU.AmTr.v1.0_scaffold00061.274 | -                    | -                        | -                     |               |
|           |    | <i>R-SAG12H5</i>   | <i>J-SAG12H5</i>   | <i>AISAG12H5</i>   | Manes.16G038400     | Posit00G0485900       | -                         | -                         | -                  | ALIG12660        | Bo006318           | Brara.B02856   | AqcoeG32500 LOC_Os01g12660   | evm_27.TU.AmTr.v1.0_scaffold00061.275 | -                    | -                        | -                     |               |
|           |    | <i>R-SAG12H6</i>   | <i>J-SAG12H6</i>   | <i>AISAG12H6</i>   | Manes.16G038400     | Posit00G0485900       | -                         | -                         | -                  | ALIG12660        | Bo006318           | Brara.B02856   | AqcoeG32500 LOC_Os01g12660   | evm_27.TU.AmTr.v1.0_scaffold00061.276 | -                    | -                        | -                     |               |
|           |    | <i>R-SAG12H7</i>   | <i>J-SAG12H7</i>   | <i>AISAG12H7</i>   | Manes.16G038400     | Posit00G0485900       | -                         | -                         | -                  | ALIG12660        | Bo006318           | Brara.B02856   | AqcoeG32500 LOC_Os01g12660   | evm_27.TU.AmTr.v1.0_scaffold00061.277 | -                    | -                        | -                     |               |
|           |    | <i>R-SAG12H8</i>   | <i>J-SAG12H8</i>   | <i>AISAG12H8</i>   | Manes.16G038400     | Posit00G0485900       | -                         | -                         | -                  | ALIG12660        | Bo006318           | Brara.B02856   | AqcoeG32500 LOC_Os01g12660   | evm_27.TU.AmTr.v1.0_scaffold00061.278 | -                    | -                        | -                     |               |
|           |    | <i>R-SAG12H9</i>   | <i>J-SAG12H9</i>   | <i>AISAG12H9</i>   | Manes.16G038400     | Posit00G0485900       | -                         | -                         | -                  | ALIG12660        | Bo006318           | Brara.B02856   | AqcoeG32500 LOC_Os01g12660   | evm_27.TU.AmTr.v1.0_scaffold00061.279 | -                    | -                        | -                     |               |
|           |    | <i>R-SAG12H10</i>  | <i>J-SAG12H10</i>  | <i>AISAG12H10</i>  | Manes.16G038400     | Posit00G0485900       | -                         | -                         | -                  | ALIG12660        | Bo006318           | Brara.B02856   | AqcoeG32500 LOC_Os01g12660   | evm_27.TU.AmTr.v1.0_scaffold00061.280 | -                    | -                        | -                     |               |
|           |    | <i>R-SAG12H11</i>  | <i>J-SAG12H11</i>  | <i>AISAG12H11</i>  | Manes.16G038400     | Posit00G0485900       | -                         | -                         | -                  | ALIG12660        | Bo006318           | Brara.B02856   | AqcoeG32500 LOC_Os01g12660   | evm_27.TU.AmTr.v1.0_scaffold00061.281 | -                    | -                        | -                     |               |
|           |    | <i>R-SAG12H12</i>  | <i>J-SAG12H12</i>  | <i>AISAG12H12</i>  | Manes.16G038400     | Posit00G0485900       | -                         | -                         | -                  | ALIG12660        | Bo006318           | Brara.B02856   | AqcoeG32500 LOC_Os01g12660   | evm_27.TU.AmTr.v1.0_scaffold00061.282 | -                    | -                        | -                     |               |
|           |    | <i>R-SAG12H13</i>  | <i>J-SAG12H13</i>  | <i>AISAG12H13</i>  | Manes.16G038400     | Posit00G0485900       | -                         | -                         | -                  | ALIG12660        | Bo006318           | Brara.B02856   | AqcoeG32500 LOC_Os01g12660   | evm_27.TU.AmTr.v1.0_scaffold00061.283 | -                    | -                        | -                     |               |
|           |    | <i>R-SAG12H14</i>  | <i>J-SAG12H14</i>  | <i>AISAG12H14</i>  | Manes.16G038400     | Posit00G0485900       | -                         | -                         | -                  | ALIG12660        | Bo006318           | Brara.B02856   | AqcoeG32500 LOC_Os01g12660   | evm_27.TU.AmTr.v1.0_scaffold00061.284 | -                    | -                        | -                     |               |
|           |    | <i>R-SAG12H15</i>  | <i>J-SAG12H15</i>  | <i>AISAG12H15</i>  | Manes.16G038400     | Posit00G0485900       | -                         | -                         | -                  | ALIG12660        | Bo006318           | Brara.B02856   | AqcoeG32500 LOC_Os01g12660   | evm_27.TU.AmTr.v1.0_scaffold00061.285 | -                    | -                        | -                     |               |
| RD19      | I  | <i>R-RD19A</i>     | <i>J-RD19A</i>     | <i>ARD19A</i>      | Manes.14G288600     | Posit00G0260000       | evm.TU.supercontig_3257.1 | Thecc1HE000619            | GSVVG01024210001   | ALIG11020        | Bo008027           | Brara.A00027   | AqcoeSG18100 LOC_Os01g27030  | evm_27.TU.AmTr.v1.0_scaffold00001.80  | 266883               | -                        | -                     |               |
|           |    | <i>R-RD19B</i>     | <i>J-RD19B</i>     | <i>ARD19B</i>      | Manes.18G018400     | Posit00G0234000       | evm.TU.supercontig_150.51 | Thecc1HE003440            | GSVVG0100987001    | ALIG38000        | Bo037199           | Brara.A00297   | AqcoeSG17600 LOC_Os01g36400  | -                                     | -                    | -                        |                       |               |
|           |    | <i>R-RD19C</i>     | <i>J-RD19C</i>     | <i>ARD19C</i>      | Manes.10G080900     | Posit00G0228400       | evm.TU.supercontig_53.142 | Thecc1HE003315            | GSVVG01016190001   | ALIG36050        | Bo045388           | Brara.B03759   | AqcoeSG13100 LOC_Os01g29760  | evm_27.TU.AmTr.v1.0_scaffold00022.391 | -                    | -                        |                       |               |
|           |    | <i>R-RD19D</i>     | <i>J-RD19D</i>     | <i>ARD19D</i>      | Manes.16G095100     | Posit00G041700        | evm.TU.supercontig_28.31  | Thecc1HE007524            | GSVVG01013078001   | ALIG36970        | Bo008941           | Brara.B01397   | AqcoeSG147600 LOC_Os01g28100 | evm_27.TU.AmTr.v1.0_scaffold00004.285 | 439207               | -                        |                       |               |
|           |    | <i>R-RD19E</i>     | <i>J-RD19E</i>     | <i>ARD19E</i>      | Manes.10G040700     | Posit00G040700        | -                         | -                         | -                  | ALIG1640         | Bo004850           | Brara.H03120   | -                            | -                                     | -                    | -                        | -                     |               |
|           |    | <i>R-RD19F</i>     | <i>J-RD19F</i>     | <i>ARD19F</i>      | Manes.10G040700     | Posit00G040700        | -                         | -                         | -                  | ALIG1640         | Bo004850           | Brara.H03120   | -                            | -                                     | -                    | -                        | -                     |               |
|           |    | <i>R-RD19G</i>     | <i>J-RD19G</i>     | <i>ARD19G</i>      | Manes.10G040700     | Posit00G040700        | -                         | -                         | -                  | ALIG1640         | Bo004850           | Brara.H03120   | -                            | -                                     | -                    | -                        | -                     |               |
|           |    | <i>R-RD19H</i>     | <i>J-RD19H</i>     | <i>ARD19H</i>      | Manes.10G040700     | Posit00G040700        | -                         | -                         | -                  | ALIG1640         | Bo004850           | Brara.H03120   | -                            | -                                     | -                    | -                        | -                     |               |
|           |    | <i>R-RD19I</i>     | <i>J-RD19I</i>     | <i>ARD19I</i>      | Manes.10G040700     | Posit00G040700        | -                         | -                         | -                  | ALIG1640         | Bo004850           | Brara.H03120   | -                            | -                                     | -                    | -                        | -                     |               |
|           |    | <i>R-RD19J</i>     | <i>J-RD19J</i>     | <i>ARD19J</i>      | Manes.10G040700     | Posit00G040700        | -                         | -                         | -                  | ALIG1640         | Bo004850           | Brara.H03120   | -                            | -                                     | -                    | -                        | -                     |               |
| ALP       | I  | <i>R-ALP1</i>      | <i>J-ALP1</i>      | <i>AALP1</i>       | Manes.10G040700     | Posit00G040700        | -                         | -                         | -                  | ALIG1640         | Bo004850           | Brara.H03120   | -                            | -                                     | -                    | -                        | -                     |               |
|           |    | <i>R-ALP2</i>      | <i>J-ALP2</i>      | <i>AALP2</i>       | Manes.10G040700     | Posit00G040700        | -                         | -                         | -                  | ALIG1640         | Bo004850           | Brara.H03120   | -                            | -                                     | -                    | -                        | -                     |               |
| CTB       | I  | <i>R-CTB1</i>      | <i>J-CTB1</i>      | <i>AICTB1</i>      | Manes.10G069000     | Posit01G0409800       | evm.TU.supercontig_57.55  | Thecc1HE000487            | GSVVG0102827001    | ALIG1630         | Bo011427           | Brara.B00106   | AqcoeSG28000 LOC_Os01g24850  | evm_27.TU.AmTr.v1.0_scaffold00048.14  | 143272               | Cce02.g119600            |                       |               |
|           |    | <i>R-CTB2</i>      | <i>J-CTB2</i>      | <i>AICTB2</i>      | Manes.10G069000     | Posit01G0409800       | evm.TU.supercontig_57.55  | Thecc1HE000487            | GSVVG0102827001    | ALIG1630         | Bo011427           | Brara.B00106   | AqcoeSG28000 LOC_Os01g24850  | evm_27.TU.AmTr.v1.0_scaffold00048.14  | 143272               | Cce12.g498850            |                       |               |

“OG” represents “orthologous group”. “-” represents “Not Detected”.
